# Supplementary material for: Radiation oncology outpatient perceptions of patient-centred care: a cross-sectional survey
Source: PubMed Central journal article supplement — BMJ Open. 2013 Feb 15;3(2):e001265. doi: 10.1136/bmjopen-2012-001265 (PMC3586157; doi:10.1136/bmjopen-2012-001265), 2013-02-15
Supplement: bmjopen-2012-001265.draft_revisions.pdf [file bmjopen-2012-001265.draft_revisions.pdf]

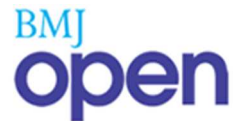

**Radiation oncology outpatient perceptions of patient-centred care: A cross-sectional survey**

|                                 |                                                                                                                                                                                                                                                                                                                                                                                                                                                                                                                                                          |
|---------------------------------|----------------------------------------------------------------------------------------------------------------------------------------------------------------------------------------------------------------------------------------------------------------------------------------------------------------------------------------------------------------------------------------------------------------------------------------------------------------------------------------------------------------------------------------------------------|
| Journal:                        | <i>BMJ Open</i>                                                                                                                                                                                                                                                                                                                                                                                                                                                                                                                                          |
| Manuscript ID:                  | bmjopen-2012-001265                                                                                                                                                                                                                                                                                                                                                                                                                                                                                                                                      |
| Article Type:                   | Research                                                                                                                                                                                                                                                                                                                                                                                                                                                                                                                                                 |
| Date Submitted by the Author:   | 06-Apr-2012                                                                                                                                                                                                                                                                                                                                                                                                                                                                                                                                              |
| Complete List of Authors:       | Mackenzie, Lisa; The University of Newcastle, Priority Research Centre for Health Behaviour, School of Medicine and Public Health<br>Sanson-Fisher, Rob; The University of Newcastle, Priority Research Centre for Health Behaviour, School of Medicine and Public Health<br>Carey, Mariko; The University of Newcastle, Priority Research Centre for Health Behaviour, School of Medicine and Public Health<br>D'Este, Catherine; The University of Newcastle, Centre for Clinical Epidemiology and Biostatistics, School of Medicine and Public Health |
| <b>Primary Subject Heading</b>: | Patient-centred medicine                                                                                                                                                                                                                                                                                                                                                                                                                                                                                                                                 |
| Secondary Subject Heading:      | Health services research, Oncology, Patient-centred medicine                                                                                                                                                                                                                                                                                                                                                                                                                                                                                             |
| Keywords:                       | Patient-Centered Care, Cross-Sectional Studies, Neoplasms, Radiation oncology < RADIOLOGY & IMAGING, Health Care Quality, Access, and Evaluation                                                                                                                                                                                                                                                                                                                                                                                                         |
|                                 |                                                                                                                                                                                                                                                                                                                                                                                                                                                                                                                                                          |

SCHOLARONE™  
Manuscripts

Only

**MANUSCRIPT TITLE:** Radiation oncology outpatient perceptions of patient-centred care: A cross-sectional survey

**SHORT TITLE:** Patient-centred cancer care

**Author names, degrees and affiliations:**

L. J. Mackenzie *BPsych (Hons)*<sup>1</sup>

R. W. Sanson-Fisher *PhD*<sup>1</sup>

M. L. Carey *D.Psych*<sup>1</sup>

C. A. D'Este *PhD*<sup>2</sup>

1. Priority Research Centre for Health Behaviour, School of Medicine and Public Health, Faculty of Health, University of Newcastle, Newcastle, Australia

2. Centre for Clinical Epidemiology and Biostatistics, School of Medicine and Public Health, Faculty of Health, University of Newcastle, Newcastle, Australia

**Address correspondence and reprints to:**

Ms Lisa Mackenzie

*Temporary Address (Until October 2012):*

Breast Surgery,

Kyoto University Hospital

54 Kawahara-cho Shogoin

Sakyo-ku 606-8507

Kyoto, JAPAN

Ph: +81 8 04562 2832

*Permanent address:*

School of Medicine and Public Health

Faculty of Health, University of Newcastle

Callaghan NSW 2308 Australia

T: +61 2 4913 8682

F: +61 2 4913 8779

E: [Lisa.Mackenzie@uon.edu.au](mailto:Lisa.Mackenzie@uon.edu.au)

**Key words:**

Patient-Centered Care

Cross-Sectional Studies

Neoplasms

Radiation Oncology

Health Care Quality, Access, and Evaluation

**Article type:** Research article

**Word count (excluding title page, abstract, references, figures and tables):** 3960

**Text pages (including title page, tables, figure and references):** 33

**Tables:** 4

**Figures:** 1

**References:** 44

**ABSTRACT:**

**Objectives.** The Institute of Medicine has indicated the urgency of evaluating and improving quality of health care, including patient-centred care. We aimed to describe the proportion and characteristics of cancer patients who perceived that better care would have greatly improved their wellbeing in a) specific, and b) multiple domains of patient-centred care.

**Design.** Cross sectional touchscreen computer survey.

**Setting.** Four Australian radiation therapy departments located within major urban public hospitals.

**Participants.** Radiation therapy outpatients were invited to participate in a touchscreen computer survey. Eligible patients were aged at least 18 years old, diagnosed with cancer, and had sufficient English to complete the survey.

**Primary outcome measure.** Participants were asked whether their wellbeing could have been greatly improved if better care had been provided across eight domains of patient-centred care. Characteristics of those respondents who identified a) specific and b) multiple domains where it was perceived that better care would have greatly improved their well-being, were examined.

**Results.** Of 508 eligible radiation therapy patients, 344 (68%) completed the survey. Patients most frequently perceived that better care in the following domains could have improved their wellbeing: information and communication about their cancer (22%;

1  
2  
3 95% CI: 18-27%); emotional and spiritual support (22%; 95% CI: 18-27%);  
4  
5 management of physical symptoms (21%; 95% CI: 17-26%); and involvement of friends  
6  
7 and family (21%; 95% CI: 17-26%). Just under one third of respondents (31%; 95% CI:  
8  
9 26-36%) indicated that their wellbeing could have been improved by better care across  
10  
11 two or more domains of care.

12  
13  
14  
15  
16 **Conclusions.** Patients in younger age groups and migrants to Australia had higher odds  
17  
18 of identifying multiple domains of patient-centredness where better care would have  
19  
20 greatly improved their wellbeing. Further investigation of patients' perceptions  
21  
22 regarding how their perceived quality might be improved is warranted.  
23  
24  
25  
26  
27  
28  
29  
30  
31  
32  
33  
34  
35  
36  
37  
38  
39  
40  
41  
42  
43  
44  
45  
46  
47  
48  
49  
50  
51  
52  
53  
54  
55  
56  
57  
58  
59  
60

For peer review only

## INTRODUCTION.

### **Why assess patient views of quality of care?**

The Institute of Medicine (IOM) has indicated the urgency of assessing and improving the quality of health care [1]. Quality health care is care that is safe, timely, effective, efficient, equitable and patient-centred [2]. A patient-centred approach to care is defined as being respectful of, and responsive to, patients' physical, social and emotional preferences and needs [3]. Provision of patient-centred care may contribute to improvements in patients' physical, mental and social well-being [4 5]. A patient-centred approach to care is now endorsed as a key component of quality health care by many organisations (including the World Health Organisation [6]) and governments (e.g. in Australia, USA, UK, Canada, Germany, France, Netherlands and Switzerland [7]). Examining patients' judgements of how their experiences of care correspond with their preferences and needs is required in order to assess the quality of patient-centred care [8].

### **What has previous patient-centred care research contributed to knowledge about prioritising quality improvement efforts?**

Although previous research has indicated that up to 50% of cancer outpatients are dissatisfied with the level of information provided about physical symptom management, emotional support, involvement of family, and some aspects of access to care,[9-11] these studies have not provided an indication of the relative importance that patients place on quality improvement in these different domain areas. The patient satisfaction approach to assessing quality of care has been criticised for failing to consider differences in patient expectations, leading to emerging research comparing discrepancies between patients' perceived ideal and actual care [12]. However, this

1  
2  
3 approach still does not capture patient perceptions of the degree to which their  
4  
5 wellbeing would benefit from improved care across different domains [13]. Perceptions  
6  
7 of relative benefit received by improvements in different domains of care may assist in  
8  
9 prioritising quality improvement efforts.  
10

11  
12  
13  
14 Previous work on patient-centred care has identified that some subgroups of patients  
15  
16 may receive poorer care than others. For instance, older patients may be more likely  
17  
18 than younger patients to express satisfaction with care, possibly relating to differences  
19  
20 in the expectations for care provision [14]. Additionally, cancer patients who have  
21  
22 clinically significant levels of anxiety have been found to give lower ratings of  
23  
24 satisfaction with care [15]. Wellbeing in patients diagnosed with chronic illness may be  
25  
26 linked to aspects of social support such as having a partner,[16] and also potentially to  
27  
28 ethnicity [17]. It is of interest to assess both the relative importance of different domains  
29  
30 of patient-centred care; and to identify the characteristics of patients who perceive the  
31  
32 need for better care.  
33  
34  
35  
36  
37  
38

### 39 **Patient-centred care for radiation therapy patients**

40  
41 Approximately 50% of cancer patients undergo radiation therapy treatment [18]. Given  
42  
43 that this treatment is often characterised by frequent contact with the healthcare system  
44  
45 over the course of treatment, the radiation therapy setting provides an opportunity for  
46  
47 addressing patient needs across the multiple domains of patient-centred care [18]. To  
48  
49 the best of our knowledge, this is the first study to ask cancer patients undergoing  
50  
51 radiation therapy about their perceptions of how better care across patient-centred  
52  
53 domains could improve their wellbeing [19]. Further, no previous studies have  
54  
55  
56  
57  
58  
59  
60

1  
2  
3 identified whether characteristics within radiation therapy patients are likely to receive  
4  
5 better patient-centred care than others [20].  
6  
7

8  
9  
10 This study aimed to examine the proportion and characteristics of radiation therapy  
11  
12 patients who indicate that their well-being could have been greatly improved by better  
13  
14 cancer care across each of eight domains of patient-centred care. We also aimed to  
15  
16 assess characteristics associated with a patient perception that better care across  
17  
18 multiple domains of patient-centred care would have improved their well-being.  
19  
20

## 21 22 23 **METHODS.**

### 24 25 **Design**

26  
27 Cross sectional survey completed using touchscreen computers.  
28  
29

### 30 31 32 **Participants**

33  
34 Radiation oncology outpatients were recruited from four radiation therapy departments  
35  
36 in a major urban centre in Australia between March and December 2010. Each radiation  
37  
38 therapy department was attached to a major public teaching hospital, and had at least  
39  
40 three Linear Accelerators available for treatment. Eligible patients were aged 18 years  
41  
42 or older; diagnosed with cancer; and had sufficient command of English to complete the  
43  
44 touchscreen computer survey. Patients who were attending the clinic for the first time  
45  
46 or who were considered by clinic staff to be too unwell or unable to give informed  
47  
48 consent were excluded.  
49  
50

### 51 52 53 54 55 **Procedure**

1  
2  
3 Patients waiting for a radiation therapy treatment were invited to participate in the  
4  
5 study by a research assistant. Consenting patients were given a unique identification  
6  
7 code to login to the touchscreen computer questionnaire. If patients were called into  
8  
9 their treatment before finishing their survey, they had the option of resuming after their  
10  
11 treatment. Touchscreen computer surveys have been reported as being faster and easier  
12  
13 to use for outpatients than pencil and paper surveys,[21] and have been found to be  
14  
15 acceptable to oncology patients [22].  
16  
17  
18  
19  
20

## 21 **Measures**

22  
23 Digivey survey software (CREOSO - Digivey Survey Center, Phoenix, Arizona) was used  
24  
25 to program the patient survey, which was administered using Dell Latitude XT2  
26  
27  
28 touchscreen laptop computers.  
29  
30  
31

32 Quality of Care: patient-centred care.

33  
34 Questions were developed to correspond with domains of patient-centred care  
35  
36 described in the literature,[9 11] ensuring face validity of the items. Survey items were  
37  
38 extensively pilot tested and modified based on feedback from 67 patients. Eight items,  
39  
40 each assessing a different domain of care, were presented on separate screens with the  
41  
42 stem "During my cancer care, my well-being would have been greatly improved by."  
43  
44

45  
46 Table 1 lists the eight items and a short description of each domain that was presented  
47  
48 at the bottom of the touchscreen. Patients were asked to indicate their level of  
49  
50 agreement with each statement on a 4-point Likert scale (Strongly disagree, Disagree,  
51  
52 Agree, Strongly agree). Internal consistency of the items was assessed using Cronbach's  
53  
54 alpha.  
55  
56  
57  
58  
59  
60



**Table 1. Survey items and descriptions (each assessing a different domain of care)**

| Item                                                                  | On screen description                                                                                                                                                       |
|-----------------------------------------------------------------------|-----------------------------------------------------------------------------------------------------------------------------------------------------------------------------|
| <b>Better management of my physical symptoms</b>                      | May relate to your pain, sleeplessness, other side-effects and symptoms.                                                                                                    |
| <b>Better information and communication about my cancer and care</b>  | May include: clear and consistent information about your diagnosis, test results, treatment, taking medications, food you should be eating, exercise you can do safely etc. |
| <b>Better emotional and/or spiritual support</b>                      | May include services or support to help you cope with: the impact of cancer on your life, doubts/worries, feelings of anxiety or sadness, changes to your body images etc.  |
| <b>Better services, information and support for my friends/family</b> | May include helping them to cope with the impact of your cancer, or providing opportunities for them to be involved in your care.                                           |
| <b>Better staff approachability and respect for me</b>                | Describes staff who are easy to contact and up-to-date with your medical history, and who give you opportunities to ask questions and be involved in treatment decisions.   |

|                                                                         |                                                                                                                                                                                    |
|-------------------------------------------------------------------------|------------------------------------------------------------------------------------------------------------------------------------------------------------------------------------|
| <b>Getting better access to the care I need when required</b>           | Describes not having to wait too long to get appointments, and having treatment and medical advice available when needed.                                                          |
| <b>Better services/support to cope with changes to my relationships</b> | May include: knowing what changes to expect, and having some strategies to reduce the impact of cancer on your work, usual social activities, friendships or sexual relationships. |
| <b>Better services/advice to assist me with practical concerns</b>      | May include being able to access financial support, transport to treatment, home help services or other support needed to manage practical issues.                                 |

Demographic characteristics.

Patient self-report was used to collect age, gender, whether participants were born in Australia, living with a partner and the postcode of usual place of residence.

Disease characteristics.

A multiple choice question "What is your most recent primary cancer diagnosis?" was used to determine respondents' most recent primary cancer diagnosis. Common cancer types were listed on screen, along with the categories "other - please specify" and "don't know". Approximate time since diagnosis was calculated from patient self-reported year and month of diagnosis and their recruitment date. Patients were asked to indicate the number of radiation therapy treatment and outpatient appointments they had attended; whether they had experienced a second diagnosis and/or recurrence, and whether they

1  
2  
3 perceived that the aim of their treatment was to cure the cancer; prevent the cancer  
4  
5 from coming back or control symptoms of cancer (cure is not possible).  
6  
7

8  
9 Psychological characteristics.

10  
11 The Hospital Anxiety and Depression Scale (HADS) is a 14-item self-report measure of  
12  
13 anxiety and depression [23]. Both the anxiety and depression subscales provide scores  
14  
15 of between 0 and 21 where 0-7= Normal; 8-10= Mild; 11-14 = Moderate; 15-21 = Severe.  
16  
17 The scale has been utilised in research and in clinical practice,[24] with demonstrated  
18  
19 reliability and validity [25]. HADS scores have been found to be comparable when  
20  
21 administered by touchscreen computer and pen-and-paper in a cancer patient  
22  
23 population [26].  
24  
25  
26  
27  
28  
29

### 30 **Statistical Methods**

31  
32 Radiation therapy patients were defined as having endorsed each domain if they  
33  
34 indicated that they “agreed” and “strongly agreed” that better care would have greatly  
35  
36 improved their well-being. The proportion of patients endorsing each domain was  
37  
38 reported with 95% confidence intervals. Respondents were then dichotomised on the  
39  
40 basis of: a) 0-1 domains endorsed or b) multiple (2 or more) domains endorsed.  
41  
42 Univariate logistic analysis was used to investigate the relationship between  
43  
44 demographic characteristics, disease factors and psychological distress and patient  
45  
46 endorsement of a) each of the 8 domains of care and b) multiple (2 or more) domains of  
47  
48 care requiring improvement. The explanatory variables examined included age (18-49,  
49  
50 50-59, 60-69, 70 plus), sex (male, female), cancer diagnosis (Breast, Prostate,  
51  
52 Other/Don’t Know), second diagnosis and/or recurrence (no, yes), Australian born (no,  
53  
54 Other/Don’t Know), second diagnosis and/or recurrence (no, yes), Australian born (no,  
55  
56 Other/Don’t Know), second diagnosis and/or recurrence (no, yes), Australian born (no,  
57  
58 yes), living with a partner (no, yes), anxiety (no, yes), depression (no, yes), usual place of  
59  
60

1  
2  
3 residence (urban/rural, based on Accessibility/Remoteness Index of Australia (ARIA+)  
4 score) and socioeconomic status (Socio-Economic Indexes for Areas (SEIFA) average  
5 scores[27]). Variables with a *p* value of 0.2 or less on the univariate likelihood ratio test  
6 were included in the multiple logistic regression model. The backwards stepwise  
7 method was then used to remove all variables with a *p* value of 0.1 or more on the  
8 likelihood ratio test, with recruitment site included in all multiple regression models.  
9  
10 The fit of the final model was assessed using the Hosmer-Lemeshow goodness of fit test.  
11  
12 For individual domains, odds ratios with 95% confidence intervals are reported for  
13 multiple regression models. For the assessment of characteristics associated with  
14 endorsing multiple domains, odds ratios with 95% confidence intervals are reported for  
15 univariate and multiple regression models. Analysis was conducted using STATA version  
16 11.2, and a significance level of 0.05 used.  
17  
18  
19  
20  
21  
22  
23  
24  
25  
26  
27  
28  
29  
30  
31

### 32 **Sample size and statistical power**

33  
34 We aimed to recruit a total of 450 patients which, based on 50% of patients perceiving  
35 the need for better care in each domain, would allow us to obtain prevalence estimates  
36 with 95% CI's within  $\pm 5\%$  of the point estimate. This sample size would also be  
37 sufficient to detect differences of approximately 15% in characteristics between those  
38 who perceive the need for better care in each domain of care with 80% power and 5%  
39 significance level.  
40  
41  
42  
43  
44  
45  
46  
47  
48  
49

### 50 **RESULTS.**

51  
52 Of the 639 patients screened for eligibility, 110 were ineligible due to: inadequate  
53 English (n=51); not currently receiving RT (n = 32); had already been approached about  
54 the study (n = 6); not being diagnosed with cancer (n = 3); clinic staff concern about  
55  
56  
57  
58  
59  
60

1  
2  
3 patient burden or ability to give informed consent (n = 3); being aged under 18 (n = 2),  
4  
5 or no specified reason (n=13). Of the 529 eligible patients, 85% (n = 451) consented, and  
6  
7 69% (n = 365) completed the survey. Incomplete surveys were primarily because  
8  
9 patients were called into their treatment appointment before survey completion, and no  
10  
11 data was available from these surveys. An additional 21 patients were excluded because  
12  
13 they reported that they were attending their first RT treatment. Once these participants  
14  
15 were ruled ineligible, the overall response rate was 68% of 508 eligible radiation  
16  
17 therapy patients. Table 2 shows the characteristics of the 344 respondents. 51% were  
18  
19 male, the median age was 63.3 (Quartile [Q] 1: 52.2, Q3: 70.5) and the median number of  
20  
21 weeks since diagnosis was 27.6 (Q1: 16.0, Q3: 57.3). The majority of respondents (97%)  
22  
23 were currently receiving radiation therapy treatment, with the remainder reporting that  
24  
25 they were attending the treatment centre for a check-up. The distribution of primary  
26  
27 cancer type within the sample can be seen in Table 2.  
28  
29  
30  
31  
32  
33  
34  
35  
36  
37  
38  
39  
40  
41  
42  
43  
44  
45  
46  
47  
48  
49  
50  
51  
52  
53  
54  
55  
56  
57  
58  
59  
60

**Table 2. Demographic and disease characteristics of respondents (n = 344)**

| <b>Characteristic</b>                           | <b>n (%)</b>           |
|-------------------------------------------------|------------------------|
| <b>Males</b>                                    | 176 (51%)              |
| <b>Region of birth</b>                          |                        |
| Australia                                       | 231 (67%)              |
| UK/Ireland                                      | 30 (8.7%)              |
| Europe                                          | 29 (8.4%)              |
| Asia                                            | 25 (7.2%)              |
| Other                                           | 29 (8.4%)              |
| <b>Perceived palliative treatment aim</b>       | 46 (14%)               |
| <b>Primary cancer type</b>                      |                        |
| Breast                                          | 93 (27%)               |
| Prostate                                        | 73 (21%)               |
| Head and neck                                   | 33 (9.6%)              |
| Colorectal                                      | 20 (5.8%)              |
| Brain                                           | 15 (4.4%)              |
| Lung                                            | 15 (4.4%)              |
| Other                                           | 89 (26%)               |
| Don't know                                      | 6 (1.7%)               |
| <b>Second diagnosis/recurrence</b>              | 96 (28%)               |
|                                                 | <b>Median (Q1, Q3)</b> |
| <b>Completed appointments with doctor</b>       | 3 (2, 5)               |
| <b>Completed radiation therapy appointments</b> | 9 (4, 17)              |
| <b>Weeks since diagnosis</b>                    | 27.6 (16, 37.3)        |

*Note.* Observations within each variable may not add to the total due to missing values

### Internal consistency of items

When considering the items with responses on a 4-point Likert scale, the internal consistency (Cronbach's  $\alpha$ ) was 0.92. When the responses were dichotomised (agree versus disagree), Cronbach's  $\alpha$  was 0.89.

### Proportion of patients endorsing individual domains of patient-centred care

Table 3 shows the number and proportion of radiation oncology patients who agreed that their well-being could have been improved by better care across 8 different domains of patient-centred care. It can be seen that each domain was endorsed by between 12% and 22% of patients.

**Table 3. Proportion who reported that their wellbeing would have been improved by better care across 8 domains ( $n = 344$ )**

|                                                                  | Agree                 |
|------------------------------------------------------------------|-----------------------|
|                                                                  | <i>n</i> (% , 95% CI) |
| <b>Information and communication about my cancer and care</b>    | 76 (22%, 18-27%)      |
| <b>Emotional and/or spiritual support</b>                        | 75 (22%, 18-27%)      |
| <b>Management of my physical symptoms</b>                        | 72 (21%, 17-26%)      |
| <b>Services; information and support for my friends/family</b>   | 72 (21%, 17-26%)      |
| <b>Services/advice to assist me with practical concerns</b>      | 69 (20%, 16-25%)      |
| <b>Access to the care I need when required</b>                   | 62 (18%, 14-23%)      |
| <b>Services/support to cope with changes to my relationships</b> | 56 (16%, 13-21%)      |

---

**Staff approachability and respect for me**42 (12%, 8.9-16%)

---

**Characteristics associated with endorsement of domains**

Multiple logistic regression analysis identified that Australian born participants had lower odds of endorsing perceiving “better management of physical symptoms” would have greatly improved their well-being (OR = 0.4; 95% CI: 0.2-0.7;  $p = 0.0008$ ). No other characteristics were significantly associated with endorsing better management of physical symptoms.

Better information and communication about my cancer and care: Australian born patients had lower odds of perceiving that “better information and communication about my cancer and care” would have greatly improved their well-being (OR = 0.5; 95% CI: 0.3-0.9;  $p = 0.0153$ ), as did patients living with a partner (OR = 0.5; 95% CI: 0.3-0.8;  $p = 0.0083$ ). It was also found that patients aged 60-69 years (OR = 0.3; 95% CI: 0.1-0.7) and aged 70 or over (OR = 0.3; 95% CI: 0.2-0.8) had lower odds of endorsing this domain than younger participants ( $p = 0.0042$ ). Patients with a likely presence of depression had three times the odds of endorsing this domain (OR = 3.1; 95% CI: 1.1-9.0;  $p = 0.0396$ ).

Better emotional and/or spiritual support: Patients aged 60-69 years (OR = 0.3; 95% CI: 0.1-0.6) and aged 70 or over (OR = 0.4; 95% CI: 0.2-0.8) had lower odds of endorsing this domain than younger participants ( $p = 0.0011$ ). Australian born patients had lower odds of endorsing this domain (OR = 0.3; 95% CI: 0.2-0.5;  $p < 0.0001$ ), whilst patients



1  
2  
3 with clinically significant levels of depression had higher odds of endorsing (OR = 3.5;  
4  
5 95% CI: 1.2-10.1;  $p = 0.0250$ ).

6  
7  
8  
9  
10 Better services, information and support for my friends/family: Lower odds of  
11  
12 endorsing this domain were found in older patients aged 60-69 years (OR = 0.2; 95% CI:  
13  
14 0.1-0.5) and aged 70 or over (OR = 0.2; 95% CI: 0.1-0.4) compared to younger  
15  
16 participants ( $p < 0.0001$ ), and also in Australian born patients (OR = 0.4; 95% CI: 0.2-0.6;  
17  
18  $p = 0.0004$ ).

19  
20  
21  
22  
23 Better staff approachability and respect for me: Australian born patients had  
24  
25 significantly lower odds of endorsing this domain (OR = 0.3; 95% CI: 0.1-0.5;  $p =$   
26  
27 0.0001). Marginally non-significantly lower odds of endorsing this domain were found in  
28  
29 older patients aged 60-69 years (OR = 0.3; 95% CI: 0.1-0.9) compared to younger  
30  
31 participants ( $p = 0.0683$ ).

32  
33  
34  
35  
36  
37 Getting better access to the care I need when required: Older patients aged 60-69 years  
38  
39 (OR = 0.2; 95% CI: 0.1-0.5) and aged 70 or over (OR = 0.3; 95% CI: 0.1-0.8) had lower  
40  
41 odds of endorsing this domain compared to younger participants ( $p = 0.0003$ ). Once  
42  
43 again, Australian born patients had lower odds of endorsing this domain (OR = 0.3; 95%  
44  
45 CI: 0.2-0.6;  $p = 0.0003$ ). Marginally non-significantly lower odds were also found in  
46  
47 socioeconomic Group 2 (OR = 0.2; 95% CI: 0.1-0.9) and Group 3 (OR = 0.3; 95% CI: 0.1-  
48  
49 0.9) compared to the lowest SES Group 1 ( $p = 0.0837$ ).

50  
51  
52  
53  
54  
55 Better services/support to cope with changes to my relationships: Older patients aged  
56  
57 60-69 years (OR = 0.1; 95% CI: 0.1-0.4) and aged 70 or over (OR = 0.2; 95% CI: 0.1-0.4)

1  
2  
3 had lower odds of endorsing this domain compared to younger participants ( $p <$   
4  
5 0.0001). Once again, Australian born patients had lower odds of endorsing this domain  
6  
7 (OR = 0.3; 95% CI: 0.1-0.5;  $p = 0.0001$ ). Patients with clinically significant levels of  
8  
9 depression had higher odds of endorsing this domain (OR = 7.2; 95% CI: 2.3-22.5;  $p =$   
10  
11 0.0007).

12  
13  
14  
15  
16 Better services/advice to assist me with practical concerns: Older patients aged 60-69  
17  
18 years (OR = 0.1; 95% CI: 0.1-0.3) and aged 70 or over (OR = 0.3; 95% CI: 0.1-0.6) had  
19  
20 lower odds of endorsing this domain compared to younger participants ( $p < 0.0001$ ).  
21  
22 Australian born patients also had lower odds of endorsing this domain (OR = 0.5; 95%  
23  
24 CI: 0.3-0.8;  $p = 0.0070$ ).

### 25 26 27 28 29 30 **Proportion of patients endorsing multiple domains where better care would have** 31 32 **improved their well-being**

33  
34 Figure 1 shows the percentage of respondents endorsing none, one and multiple  
35  
36 domains where better care would have improved their wellbeing. Overall 31% of  
37  
38 respondents ( $n = 107$ ) endorsed multiple domains where they agreed or strongly agreed  
39  
40 that their wellbeing could have been improved by better care.  
41  
42  
43  
44

45  
46 FIGURE 1 ABOUT HERE  
47  
48  
49

50  
51 For 55% of participants, it was perceived that improvement in well-being would not  
52  
53 have resulted from better care in any of the examined domains. Fourteen percent of  
54  
55 participants identified only one domain where better care would have greatly improved  
56  
57 their well-being. Table 4 shows the results of analyses examining factors associated with  
58  
59  
60

the perception that wellbeing could have been improved by better care in multiple (2 or more) domains. It can be seen that compared with the younger age group (18-49 years), being aged 60 years or over was associated with significantly lower odds of endorsing multiple domains as requiring improvement. Additionally, relative to patients not born in Australia, those who were Australian born had significantly lower odds of endorsing multiple domains in which wellbeing would have been improved by better care.

Outpatients living with a partner had significantly lower odds of identifying multiple domains where better care would have greatly improved their wellbeing. There were significantly higher odds of endorsing multiple domains amongst outpatients with a likely presence of anxiety.

**Table 4. Demographic, disease and HADS associations with endorsement of multiple domains as requiring improvement¶**

|                     | <b>Multiple domains endorsed<br/><i>n</i> (%)</b> | <b>LR Chi<sup>2</sup>, <i>p</i><br/>Unadjusted<br/>OR (95% CI)   </b> | <b>LR Chi<sup>2</sup>, <i>p</i><br/>Adjusted<br/>OR (95% CI)   </b> |
|---------------------|---------------------------------------------------|-----------------------------------------------------------------------|---------------------------------------------------------------------|
| <b>Hospital</b>     |                                                   | <b>5.0, <i>p</i> = 0.1752</b>                                         | <b>2.9, <i>p</i> = 0.4002</b>                                       |
| Site 1              | 36 (36%)                                          | 1.0                                                                   | 1.0                                                                 |
| Site 2              | 22 (23%)                                          | 0.5 (0.3-1.0)                                                         | 0.6 (0.3-1.2)                                                       |
| Site 3              | 23 (32%)                                          | 0.8 (0.4-1.6)                                                         | 0.9 (0.4-1.8)                                                       |
| Site 4              | 26 (34%)                                          | 0.9 (0.5-1.7)                                                         | 1.0 (0.5-2.0)                                                       |
| <b>Age category</b> |                                                   | <b>35.9, <i>p</i> &lt;0.0001</b>                                      | <b>28.9, <i>p</i></b>                                               |
| 18-49 years         | 36 (51%)                                          | 1.0                                                                   | <b>&lt;0.0001*</b>                                                  |

|                                       |          |                        |                         |
|---------------------------------------|----------|------------------------|-------------------------|
| 50-59 years                           | 34 (46%) | 0.8 (0.4-1.5)          | 1.0                     |
| 60-69 years                           | 20 (18%) | 0.2 (0.1-0.4)          | 0.7 (0.4-1.4)           |
| 70 years plus                         | 17 (19%) | 0.2 (0.1-0.4)          | 0.2 (0.1-0.4)           |
|                                       |          |                        | 0.2 (0.1-0.5)           |
| <b>Sex§</b>                           |          | <b>2.5, p = 0.1159</b> |                         |
| Male                                  | 48 (27%) | 1.0                    |                         |
| Female                                | 59 (35%) | 1.4 (0.9-2.3)          |                         |
| <b>Cancer type§</b>                   |          | <b>3.8, p = 0.1469</b> |                         |
| Breast                                | 31 (33%) | 1.0                    |                         |
| Prostate                              | 16 (22%) | 0.6 (0.3-1.1)          |                         |
| Other cancer types†                   | 60 (34%) | 1.0 (0.6-1.7)          |                         |
| <b>Second diagnosis or recurrence</b> |          | <b>1.0, p = 0.3123</b> |                         |
| No                                    | 81 (33%) | 1.0                    |                         |
| Yes                                   | 26 (27%) | 0.8 (0.5-1.3)          |                         |
| <b>Born in Australia</b>              |          | <b>8.5, p = 0.0037</b> | <b>5.4, p = 0.0205*</b> |
| No                                    | 47 (42%) | 1.0                    | 1.0                     |
| Yes                                   | 60 (26%) | 0.5 (0.3-0.8)          | 0.5 (0.3-0.9)           |
| <b>Socioeconomic status</b>           |          | <b>0.3, p = 0.5758</b> |                         |
| Low                                   | 5 (22%)  | 1.0                    |                         |
| Medium                                | 8 (16%)  | 0.7 (0.2-2.4)          |                         |
| High                                  | 59 (22%) | 1.0 (0.4-2.9)          |                         |
| <b>Usual place of residence</b>       |          | <b>0.3, p = 0.5758</b> |                         |
| Major city                            | 87 (32%) | 1.0                    |                         |
| Regional or rural                     | 19 (28%) | 0.8 (0.5-1.5)          |                         |

|                                            |          |                         |                         |
|--------------------------------------------|----------|-------------------------|-------------------------|
| <b>Living with partner</b>                 |          | <b>5.2, p = 0.0224</b>  | <b>3.9, p = 0.0481*</b> |
| No                                         | 50 (38%) | 1.0                     | 1.0                     |
| Yes                                        | 57 (27%) | 0.6 (0.4-0.9)           | 0.6 (0.4-1.0)           |
| <b>Clinically significant anxiety‡</b>     |          | <b>10.4, p = 0.0013</b> | <b>4.3, p = 0.0383*</b> |
| No                                         | 82 (28%) | 1.0                     | 1.0                     |
| Yes                                        | 25 (52%) | 2.8 (1.5-5.2)           | 2.1 (1.0-4.1)           |
| <b>Clinically significant depression‡§</b> |          | <b>5.7, p = 0.0167</b>  |                         |
| No                                         | 97 (30%) | 1                       |                         |
| Yes                                        | 10 (59%) | 3.3 (1.2-9.0)           |                         |

*Note.* Observations within each variable may not add to the total due to missing values

†Including brain, colorectal, head and neck, lung, non-Hodgkin's lymphoma, and other cancer types

‡Assessed using the Hospital Anxiety and Depression Scale (HADS)

§Eliminated during backwards stepwise multiple logistic regression analysis

|| Reported *p*-values are from the Likelihood ratio test

¶ *p*-values for the Hosmer-Lemeshow goodness of fit test were between 0.2 and 0.9 for specific domain models; and was 0.1 for the multiple domain model

## DISCUSSION

### **In which domains would better care greatly improve wellbeing for the most patients?**

For each of the eight domains of care assessed, between 12-22% of respondents agreed or strongly agreed that their wellbeing would have greatly improved with better care.

One fifth or more agreed that improvements to the following domains would have improved their care: better information and communication about my cancer and care (22%); better emotional and/or spiritual support (22%); better management of physical symptoms (21%); better services information and support for friends/family (21%); and better services/advice to assist with practical concerns (20%). Overall, these frequencies were lower than identified in comparable domains in recent international studies of cancer patient experiences of care in Australia, New Zealand, British Columbia, Canada and Europe [9 10 15 28 29]. This discrepancy may be a consequence of the differences in measures. Although past measures have assessed experiences of care or unmet need, they have not assessed the impact that patients perceive better care in these patient-centred domains would have on their wellbeing. Alternatively, the discrepancies between findings may be a result of improved delivery of patient centred care over time.

### **Characteristics associated with endorsing each domain of patient-centred care**

#### Country of birth

Australian born patients had lower odds of endorsing each of the assessed domains of patient-centred care. It may be that Australian born patients receive better care than migrants. Alternatively, it may be that Australian born patients have lower expectations

1  
2  
3 of care and of the degree to which their well-being would be improved by better care  
4  
5 [30]. Linguistic and cultural barriers to patient perceptions of high quality health care  
6  
7 have been previously identified, highlighting the need for responsiveness to cultural  
8  
9 background for optimal health care delivery [30]. There is a need to investigate this  
10  
11 finding amongst more culturally and linguistically diverse cancer communities, given  
12  
13 that the current research was limited to patients with adequate English to complete the  
14  
15 survey.  
16  
17  
18  
19

#### 20 21 Age group

22  
23 Older age was associated with lower odds of endorsing a need for improvement in all  
24  
25 domains of patient-centred care, with the exception of management of physical  
26  
27 symptoms and staff approachability and respect for the patient. This is consistent with  
28  
29 previous studies suggesting that older age is associated with higher overall patient  
30  
31 satisfaction ratings [31]. It may be that older patients perceive pain management and  
32  
33 interpersonal care as a traditional role of the doctor, leading to similar perceptions  
34  
35 about the need for improvement in these domains as held by younger age groups.  
36  
37  
38  
39

#### 40 41 HADS classified depression

42  
43 Patients with HADS classified depression had higher odds of endorsing the following  
44  
45 three domains than non-depressed respondents: Information and communication about  
46  
47 cancer and care; emotional and spiritual support; and support with changes to  
48  
49 relationships. A diagnosis of chronic disease with comorbid depression has previously  
50  
51 been associated with perceptions of poor doctor-patient communication [32]. This may  
52  
53 be because depressive symptoms such as negative affect may make interactions with  
54  
55 health care providers more strained and less effective than for non-depressed patients  
56  
57  
58  
59  
60

1  
2  
3 [33 34]. Alternatively it may be that there are patient recall difficulties arising from  
4  
5 depressive symptoms such as poor concentration, leading to negative patient  
6  
7 perceptions of information provision and communication [32].  
8  
9

#### 10 11 Socioeconomic status

12  
13 Higher socioeconomic groups were found to have marginally significantly lower odds of  
14  
15 endorsing issues relating to getting access to care when required. Patients from higher  
16  
17 SES areas may be more likely to live in wealthier urban areas that are closer to health  
18  
19 care facilities, and therefore have less difficulties with access [35]. Given Australia's  
20  
21 dispersed population, access to cancer care service delivery can be challenging for  
22  
23 patients from lower SES areas, particularly those in rural and regional areas. This is  
24  
25 particularly the case for accessing radiation therapy treatment, which is only available in  
26  
27 metropolitan centres and very few major regional centres [36].  
28  
29  
30  
31  
32  
33

#### 34 35 **Multiple domains of patient-centred care: Characteristics of particularly** 36 37 **vulnerable groups**

38  
39 Overall, 31% of patients indicated that better care in multiple domains of patient-  
40  
41 centred care would have greatly improved their well-being. Older patients had lower  
42  
43 odds of reporting that improvements in their care were needed multiple domains of  
44  
45 care. This finding has been frequently reported in patient satisfaction research [31]. It  
46  
47 has been suggested that this may reflect differences in the expectations or preferences of  
48  
49 care of older people compared to younger people [14]. Consistent with the findings  
50  
51 across the individual domains of care, patients born in Australia had lower odds of  
52  
53 endorsing multiple domains where better care would have greatly improved their  
54  
55  
56  
57  
58  
59  
60



1  
2  
3 wellbeing. This is consistent with findings of lower patient satisfaction has been  
4  
5 reported in migrant groups in international settings [30].  
6  
7

8  
9  
10 A significant trend towards lower odds of reporting improvements in their care were  
11  
12 needed was seen in those respondents living with a partner. Spranger et al [16] reported  
13  
14 that quality of life in individuals with chronic disease was higher amongst those with a  
15  
16 partner. Family members and carers may play an important role in assisting patients to  
17  
18 navigate the health care system and may advocate on the patient's behalf [37]. Patients'  
19  
20 self-management skills may also be complemented by having a support person,[38]  
21  
22 however these findings warrant further exploration in cancer settings [39].  
23  
24  
25

26  
27  
28 As expected, an association was found between clinically significant anxiety levels and  
29  
30 patients' perceptions that their well-being could be improved by better care across  
31  
32 multiple patient-centred domains. This is consistent with findings suggesting that  
33  
34 individuals suffering from elevated levels of anxiety may be more likely to be critical of  
35  
36 the health care system [40]. Alternatively, anxiety may affect interactions with health  
37  
38 care providers and the effectiveness of help seeking behaviours, resulting in the receipt  
39  
40 of poorer care across multiple domains. This finding suggests that there is a need to  
41  
42 identify these patients in clinical practice and reduce their perceived room for  
43  
44 improvement in wellbeing by alleviating their anxiety and improving their perceptions  
45  
46 of care [41].  
47  
48  
49

### 50 51 52 **Strengths and Limitations**

53  
54  
55 The current study achieved a high consent rate compared to recent research examining  
56  
57 cancer outpatient satisfaction with care,[10] and to the best of our knowledge, is also the  
58  
59

1  
2  
3 first large study to assess patient-centred care in radiation therapy outpatients [42].  
4  
5 Heterogeneous cancer sites and stages were included to provide clinics with information  
6  
7 about which patient groups may be missing out on elements of patient-centred care. The  
8  
9 quality of care measure was developed following extensive pilot testing and with  
10  
11 reference to the literature, and the domains have been supported by a recent qualitative  
12  
13 study with radiation oncology patients [42]. Therefore, it appears to have face validity as  
14  
15 well as internal reliability. However, further examination of its psychometric properties  
16  
17 is needed. Demographic information was collected via patient self-report. Accuracy of  
18  
19 this method has been questioned,[43] however has been shown to produce reliable  
20  
21 responses for these demographic variables,[44] and is a cost effective and feasible way  
22  
23 of collecting these data.  
24  
25  
26  
27  
28  
29

### 30 **Conclusions**

31  
32 Thirty-one percent of respondents identified that better care across multiple domains  
33  
34 would have greatly improved their well-being. “Information and education”, “emotional  
35  
36 and spiritual support”, “management of physical symptoms” and “involvement of friends  
37  
38 and family” were the 4 domains most commonly identified where better care would  
39  
40 have increased respondent well-being. Older patients and patients born in Australia had  
41  
42 significantly lower odds of identifying multiple domains of patient-centred care where  
43  
44 better care would have improved their well-being. This suggests that younger patients  
45  
46 and migrants to Australia appear to be more likely to identify that better care would be  
47  
48 of benefit to their wellbeing. Further investigation of how these factors interact with  
49  
50 wellbeing and the provision of patient-centred care may assist in developing targeted  
51  
52 interventions to improve outcomes for these groups.  
53  
54  
55  
56  
57  
58  
59  
60

**ACKNOWLEDGEMENTS:**

We would like to thank Sundresan Naicker, Jay Roberts, Kelauren Barry and Ryan Courtney for their assistance with data collection for this study. We would also like to thank Dr Patrick McElduff, Mr Daniel Barker and Mr Michael Fitzgerald for their guidance with statistical analysis. We would also like to thank the staff and patients at the participating radiation oncology treatment centres.

**COMPETING INTERESTS:**

There are no disclosures from any authors.

**FUNDING STATEMENT:**

This research received no specific grant from any funding agency in the public, commercial or not-for-profit sectors. Lisa Mackenzie's PhD candidature is supported by The University of Newcastle School of Medicine and Public Health Professor Jill Cockburn Scholarship in Health Behaviour. Dr. Mariko Carey is supported by a Hunter Medical Research Institute (HMRI) Fellowship. The touchscreen computer resources and patient recruitment costs were covered by a 2009 University of Newcastle Priority Research Centre for Health Behaviour research grant.

**REFERENCE LIST.**

1. Chassin MR, Galvin RW, and the National Roundtable on Health Care Quality. The Urgent Need to Improve Health Care Quality. *JAMA* 1998;**280**(11):1000-05 doi: 10.1001/jama.280.11.1000
2. Institute of Medicine. *Crossing The Quality Chasm: A New Health System for the 21<sup>st</sup> Century*. Washington DC: National Academy Press, 2001.
3. Lewin S, Skea Z, Entwistle VA, et al. Interventions for providers to promote a patient-centred approach in clinical consultations. *Cochrane Database Syst Rev* 2001(4):Art. No.: CD003267. doi: 10.1002/14651858.CD003267
4. Kinmonth AL, Woodcock A, Griffin S, et al. Randomised controlled trial of patient centred care of diabetes in general practice: impact on current wellbeing and future disease risk. The Diabetes Care From Diagnosis Research Team. *BMJ* 1998;**317**(7167):1202-8 doi: 10.1136/bmj.317.7167.1202
5. Epstein RM, Fiscella K, Lesser CS, et al. Why The Nation Needs A Policy Push On Patient-Centered Health Care. *Health Aff (Millwood)* 2010;**29**(8):1489-95 doi: 10.1377/hlthaff.2009.0888
6. Arah OA, Westert GP, Hurst J, et al. A conceptual framework for the OECD Health Care Quality Indicators Project. *Int J Qual Health Care* 2006;**18**(Suppl 1):5-13 doi: 10.1093/intqhc/mzl024
7. Groene O, Skau JKH, Frølich A. An international review of projects on hospital performance assessment. *Int J Qual Health Care* 2008;**20**(3):162-171 doi: 10.1093/intqhc/mzn008
8. Stewart M. Towards a global definition of patient centred care. *BMJ* 2001;**322**(7284):444-45 doi: 10.1136/bmj.322.7284.444

- 1  
2  
3 9. Ouwens M, Hermens R, Hulscher M, et al. Development of indicators for patient-  
4  
5 centred cancer care. *Support Care Cancer* 2010;**18**(1):121-30 doi:  
6  
7 10.1007/s00520-009-0638-y  
8  
9  
10 10. Cancer Institute NSW. New South Wales Cancer Patient Satisfaction Survey 2008.  
11  
12 Sydney: Cancer Institute NSW, July 2009.  
13  
14 11. Jenkinson C, Coulter A, Bruster S, et al. Patients' experiences and satisfaction with  
15  
16 health care: results of a questionnaire study of specific aspects of care. *Qual Saf*  
17  
18 *Health Care* 2002;**11**(4):335-39 doi: 10.1136/qhc.11.4.335  
19  
20  
21 12. Goldzweig G, Meirowitz A, Hubert A, et al. Meeting Expectations of Patients With  
22  
23 Cancer: Relationship Between Patient Satisfaction, Depression, and Coping. *J Clin*  
24  
25 *Oncol* 2010;**28**(9):1560-65 doi: 10.1200/jco.2009.25.4987  
26  
27  
28 13. Carr AJ, Gibson B, Robinson PG. Is quality of life determined by expectations or  
29  
30 experience? *BMJ* 2001;**322**(7296):1240-43 doi: 10.1136/bmj.322.7296.1240  
31  
32  
33 14. Wan GJ, Counte MA, Cella DF, et al. An analysis of the impact of demographic, clinical,  
34  
35 and social factors on health-related quality of life. *Value Health* 1999;**2**(4):308-18  
36  
37 doi: 10.1046/j.1524-4733.1999.24006.x  
38  
39 15. Von Essen L, Larsson G, ÖBerg K, et al. 'Satisfaction with care': associations with  
40  
41 health-related quality of life and psychosocial function among Swedish patients  
42  
43 with endocrine gastrointestinal tumours. *Eur J Cancer Care* 2002;**11**(2):91-99  
44  
45 doi: 10.1046/j.1365-2354.2002.00293.x  
46  
47  
48 16. Sprangers MAG, de Regt EB, Andries F, et al. Which chronic conditions are associated  
49  
50 with better or poorer quality of life? *J Clin Epidemiol* 2000;**53**(9):895-907 doi:  
51  
52 10.1016/s0895-4356(00)00204-3  
53  
54  
55  
56  
57  
58  
59  
60

- 1  
2  
3 17. Gotay CC, Holup JL, Pagano I. Ethnic differences in quality of life among early breast  
4  
5 and prostate cancer survivors. *Psychooncology* 2002;**11**(2):103-13 doi:  
6  
7 10.1002/pon.568  
8  
9  
10 18. Delaney G, Jacob S, Featherstone C, et al. The role of radiotherapy in cancer  
11  
12 treatment. *Cancer* 2005;**104**(6):1129-37 doi: 10.1002/cncr.21324  
13  
14 19. Siekkinen M, Laiho R, Ruotsalainen E, et al. Quality of care experienced by Finnish  
15  
16 cancer patients during radiotherapy. *Eur J Cancer Care (Engl)* 2008;**17**(4):387-93  
17  
18 doi: 10.1111/j.1365-2354.2007.00883.x  
19  
20  
21 20. Sandoval GA, Brown AD, Sullivan T, et al. Factors that influence cancer patients'  
22  
23 overall perceptions of the quality of care. *Int J Qual Health Care* 2006;**18**(4):266-  
24  
25 74 doi: 10.1093/intqhc/mzl014  
26  
27  
28 21. Larsson BW. Touch-screen versus paper-and-pen questionnaires: effects on patients'  
29  
30 evaluations of quality of care. *Int J Health Care Qual Assur Inc Leadersh Health*  
31  
32 *Serv* 2006;**19**(4-5):328-38 doi: 10.1108/09526860610671382  
33  
34  
35 22. Newell S, Girgis A, Sanson-Fisher R, et al. Are touchscreen computer surveys  
36  
37 acceptable to medical oncology patients. *J Psychosoc Oncol* 1997;**15**:37-46 doi:  
38  
39 10.1300/J077v15n02\_03  
40  
41  
42 23. Zigmond A, Snaith R. The Hospital Anxiety and Depression Scale. *Acta Psychiatr*  
43  
44 *Scand* 1983;**67**:361-70  
45  
46 24. Herrmann C. International experiences with the Hospital Anxiety and Depression  
47  
48 Scale-A review of validation data and clinical results. *J Psychosom Res*  
49  
50 1997;**42**(1):17-41 doi: 10.1016/s0022-3999(96)00216-4  
51  
52  
53 25. Moorey S, Greer S, Watson M, et al. The factor structure and factor stability of the  
54  
55 Hospital Anxiety and Depression Scale in Patients with Cancer. *Br J Psychiatry*  
56  
57 1991;**158**:225-59.  
58  
59  
60

- 1  
2  
3 26. Boyes A, Newell S, Girgis A. Rapid assessment of psychosocial well-being: Are  
4 computers the way forward in a clinical setting? *Qual Life Res* 2002;**11**(1):27-35  
5  
6 doi: 10.1023/A:1014407819645  
7  
8  
9  
10 27. Australian Bureau of Statistics. SEIFA: Socio-economic indexes for areas. Secondary  
11 SEIFA: Socio-economic indexes for areas 2008.  
12  
13 [http://www.abs.gov.au/websitedbs/D3310114.nsf/home/Seifa\\_entry\\_page](http://www.abs.gov.au/websitedbs/D3310114.nsf/home/Seifa_entry_page).  
14  
15  
16 28. O'Brien I, Britton E, Sarfati D, et al. The voice of experience: results from Cancer  
17 Control New Zealand's first national cancer care survey. *N Z Med J*  
18  
19 2010;**123**(1325):10-9 doi: 10.1016/j.radonc.2011.08.005  
20  
21  
22  
23 29. Watson DE, Mooney D, Peterson S. Patient experiences with ambulatory cancer care  
24 in British Columbia, 2005/06: UBC Centre for Health Services and Policy  
25  
26 Research, March 2007.  
27  
28  
29  
30 30. Harmsen JAM, Bernsen RMD, Bruijnzeels MA, et al. Patients' evaluation of quality of  
31 care in general practice: What are the cultural and linguistic barriers? *Patient*  
32  
33 *Educ Couns* 2008;**72**(1):155-62 doi: 10.1016/j.pec.2008.03.018  
34  
35  
36  
37 31. Jaipaul CK, Rosenthal GE. Are Older Patients More Satisfied With Hospital Care Than  
38  
39 Younger Patients? *J Gen Intern Med* 2003;**18**(1):23-30 doi: 10.1046/j.1525-  
40  
41 1497.2003.20114.x  
42  
43  
44 32. Schenker Y, Stewart A, Na B, et al. Depressive symptoms and perceived doctor-  
45  
46 patient communication in the Heart and Soul study. *J Gen Intern Med*  
47  
48 2009;**24**(5):550-6 doi: 10.1007/s11606-009-0937-5  
49  
50  
51 33. Hall JA, Horgan TG, Stein TS, et al. Liking in the physician-patient relationship.  
52  
53 *Patient Educ Couns* 2002;**48**(1):69-77 doi: 10.1016/s0738-3991(02)00071-x  
54  
55  
56  
57  
58  
59  
60

- 1  
2  
3 34. Hall JA, Roter DL, Milbrun MA, et al. Patients' Health as a Predictor of Physician and  
4  
5 Patient Behavior in Medical Visits: A Synthesis of Four Studies. *Med Care*  
6  
7 1996;**34**(12):1205-18.  
8  
9  
10 35. Paul C, Carey M, Anderson A, et al. Cancer patients' concerns regarding access to  
11  
12 cancer care: perceived impact of waiting times along the diagnosis and treatment  
13  
14 journey. *Eur J Cancer Care (Engl)* Published Online First: 23 November 2011. doi:  
15  
16 10.1111/j.1365-2354.2011.01311.x  
17  
18  
19 36. Lehmann F, Hedges A, Hunt B. Barriers to rural patients electing to have  
20  
21 radiotherapy. Special report: Radiotherapy Summit 2000: Cancer Council  
22  
23 Australia, November 2002.  
24  
25  
26 37. Sales E. Family burden and quality of life. *Qual Life Res* 2003;**12**(Suppl 1):33-41 doi:  
27  
28 10.1023/a:1023513218433  
29  
30 38. Clark PC, Dunbar SB. Family partnership intervention: a guide for a family approach  
31  
32 to care of patients with heart failure. *AACN Clin Issues* 2003;**14**(4):467-76  
33  
34  
35 39. Rijken M, Jones M, Heijmans M, et al. Supporting self-management. In: Nolte E, McKee  
36  
37 M, eds. *Caring for people with chronic conditions: a health system perspective*.  
38  
39 Berkshire: Open University Press, 2008:116-42.  
40  
41 40. Shilling V, Jenkins V, Fallowfield L. Factors affecting patient and clinician satisfaction  
42  
43 with the clinical consultation: Can communication skills training for clinicians  
44  
45 improve satisfaction? *Psychooncology* 2003;**12**(6):599-611 doi: 10.1002/pon.731  
46  
47  
48 41. Lin H-R, Bauer-Wu SM. Psycho-spiritual well-being in patients with advanced cancer:  
49  
50 an integrative review of the literature. *J Adv Nurs* 2003;**44**(1):69-80 doi:  
51  
52 10.1046/j.1365-2648.2003.02768.x  
53  
54  
55  
56  
57  
58  
59  
60



- 1  
2  
3 42. Nijman JL, Sixma H, Triest Bv, et al. The quality of radiation care: The results of focus  
4  
5 group interviews and concept mapping to explore the patient's perspective.  
6  
7 *Radiother Oncol* 2012;**102**(1):154-60 doi: 10.1016/j.radonc.2011.08.005  
8  
9  
10 43. Manjer J, Merlo J, Berglund G. Validity of self-reported information on cancer:  
11  
12 Determinants of under- and over-reporting. *Eur J Epidemiol* 2004;**19**(3):239-47  
13  
14 doi: 10.1023/B:EJEP.0000020347.95126.11  
15  
16 44. Bergmann MM, Calle EE, Mervis CA, et al. Validity of self-reported cancers in a  
17  
18 propsective cohort study in comparison with data from state cancer registries.  
19  
20 *Am J Epidemiol* 1998;**147**(6):556-62  
21  
22  
23  
24  
25  
26  
27  
28  
29  
30  
31  
32  
33  
34  
35  
36  
37  
38  
39  
40  
41  
42  
43  
44  
45  
46  
47  
48  
49  
50  
51  
52  
53  
54  
55  
56  
57  
58  
59  
60

1  
2  
3  
4  
5  
6  
7  
8  
9  
10  
11  
12  
13  
14  
15  
16  
17  
18  
19  
20  
21  
22  
23  
24  
25  
26  
27  
28  
29  
30  
31  
32  
33  
34  
35  
36  
37  
38  
39  
40  
41  
42  
43  
44  
45  
46  
47  
48  
49  
50  
51  
52  
53  
54  
55  
56  
57  
58  
59  
60

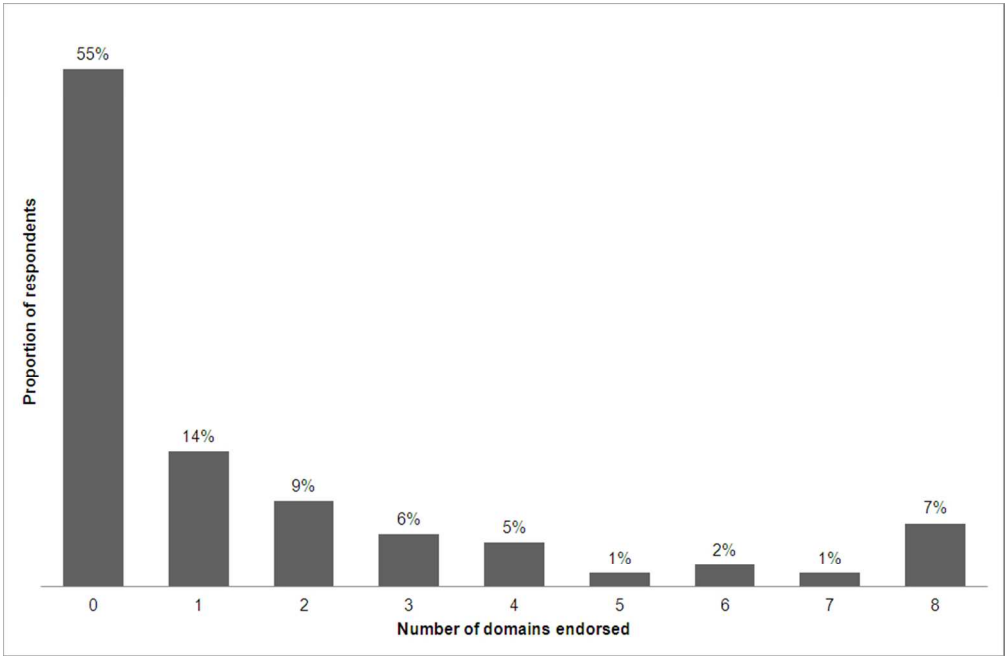

Figure 1. Percentage of respondents endorsing 0-8 domains in which better care would have greatly improved their well-being

Review only

STROBE Statement—Checklist of items that should be included in reports of *cross-sectional studies*

|                              | Item No | Recommendation                                                                                                                                                                                                                                                                                                                                                                                                                                                                                                                                                                                          |
|------------------------------|---------|---------------------------------------------------------------------------------------------------------------------------------------------------------------------------------------------------------------------------------------------------------------------------------------------------------------------------------------------------------------------------------------------------------------------------------------------------------------------------------------------------------------------------------------------------------------------------------------------------------|
| <b>Title and abstract</b>    | 1       | (a) Indicate the study's design with a commonly used term in the title or the abstract<br>"Radiation oncology outpatient perceptions of patient-centred care: A cross-sectional survey"<br>(b) Provide in the abstract an informative and balanced summary of what was done and what was found<br>See pages 2-3                                                                                                                                                                                                                                                                                         |
| <b>Introduction</b>          |         |                                                                                                                                                                                                                                                                                                                                                                                                                                                                                                                                                                                                         |
| Background/rationale         | 2       | Explain the scientific background and rationale for the investigation being reported<br>See pages 4-6                                                                                                                                                                                                                                                                                                                                                                                                                                                                                                   |
| Objectives                   | 3       | State specific objectives, including any prespecified hypotheses<br>See page 6                                                                                                                                                                                                                                                                                                                                                                                                                                                                                                                          |
| <b>Methods</b>               |         |                                                                                                                                                                                                                                                                                                                                                                                                                                                                                                                                                                                                         |
| Study design                 | 4       | Present key elements of study design early in the paper<br>See "Design" section on page 6                                                                                                                                                                                                                                                                                                                                                                                                                                                                                                               |
| Setting                      | 5       | Describe the setting, locations, and relevant dates, including periods of recruitment, exposure, follow-up, and data collection<br>See "Participants" and "Procedure" sections on pages 6-7                                                                                                                                                                                                                                                                                                                                                                                                             |
| Participants                 | 6       | (a) Give the eligibility criteria, and the sources and methods of selection of participants<br>See "Participants" and "Procedure" sections on page 6-7                                                                                                                                                                                                                                                                                                                                                                                                                                                  |
| Variables                    | 7       | Clearly define all outcomes, exposures, predictors, potential confounders, and effect modifiers. Give diagnostic criteria, if applicable<br>See "Measures" section on pages 7-10, including Table 1.                                                                                                                                                                                                                                                                                                                                                                                                    |
| Data sources/<br>measurement | 8*      | For each variable of interest, give sources of data and details of methods of assessment (measurement). Describe comparability of assessment methods if there is more than one group<br>See "Measures" section on pages 7-10, including Table 1.                                                                                                                                                                                                                                                                                                                                                        |
| Bias                         | 9       | Describe any efforts to address potential sources of bias<br>See "Statistical methods" section on pages 10-11.                                                                                                                                                                                                                                                                                                                                                                                                                                                                                          |
| Study size                   | 10      | Explain how the study size was arrived at<br>See "Sample size and statistical power" section on page 11.                                                                                                                                                                                                                                                                                                                                                                                                                                                                                                |
| Quantitative variables       | 11      | Explain how quantitative variables were handled in the analyses. If applicable, describe which groupings were chosen and why<br>See "Statistical methods" section on pages 10-11.                                                                                                                                                                                                                                                                                                                                                                                                                       |
| Statistical methods          | 12      | (a) Describe all statistical methods, including those used to control for confounding<br>See "Statistical methods" section on pages 10-11.<br>(b) Describe any methods used to examine subgroups and interactions<br>See "Statistical methods" section on pages 10-11.<br>(c) Explain how missing data were addressed<br>See "Statistical methods" section on pages 10-11.<br>(d) If applicable, describe analytical methods taking account of sampling strategy<br>N/A<br>(e) Describe any sensitivity analyses<br>N/A. For assessment of internal consistency of items see "Measures" section page 7. |

**Results**

|                  |     |                                                                                                                                                                                                                                                                                                           |
|------------------|-----|-----------------------------------------------------------------------------------------------------------------------------------------------------------------------------------------------------------------------------------------------------------------------------------------------------------|
| Participants     | 13* | (a) Report numbers of individuals at each stage of study—eg numbers potentially eligible, examined for eligibility, confirmed eligible, included in the study, completing follow-up, and analysed<br><a href="#">See page 11-12</a>                                                                       |
|                  |     | (b) Give reasons for non-participation at each stage<br><a href="#">See page 12</a>                                                                                                                                                                                                                       |
|                  |     | (c) Consider use of a flow diagram<br><a href="#">Reported in text.</a>                                                                                                                                                                                                                                   |
| Descriptive data | 14* | (a) Give characteristics of study participants (eg demographic, clinical, social) and information on exposures and potential confounders<br><a href="#">See Table 2.</a>                                                                                                                                  |
|                  |     | (b) Indicate number of participants with missing data for each variable of interest<br><a href="#">See Table 2 and Table 4.</a>                                                                                                                                                                           |
| Outcome data     | 15* | Report numbers of outcome events or summary measures<br><a href="#">See pages 14-20.</a>                                                                                                                                                                                                                  |
| Main results     | 16  | (a) Give unadjusted estimates and, if applicable, confounder-adjusted estimates and their precision (eg, 95% confidence interval). Make clear which confounders were adjusted for and why they were included<br><a href="#">See pages 14-20, “Statistical methods” pages 10-11, and Tables 3 &amp; 4.</a> |
|                  |     | (b) Report category boundaries when continuous variables were categorized<br><a href="#">See “Statistical methods” section on pages 10-11, and Table 4.</a>                                                                                                                                               |
|                  |     | (c) If relevant, consider translating estimates of relative risk into absolute risk for a meaningful time period<br><a href="#">N/A</a>                                                                                                                                                                   |
| Other analyses   | 17  | Report other analyses done—eg analyses of subgroups and interactions, and sensitivity analyses<br><a href="#">N/A</a>                                                                                                                                                                                     |

**Discussion**

|                  |    |                                                                                                                                                                                                                |
|------------------|----|----------------------------------------------------------------------------------------------------------------------------------------------------------------------------------------------------------------|
| Key results      | 18 | Summarise key results with reference to study objectives<br><a href="#">See pages 21-25.</a>                                                                                                                   |
| Limitations      | 19 | Discuss limitations of the study, taking into account sources of potential bias or imprecision. Discuss both direction and magnitude of any potential bias<br><a href="#">See pages 24-25.</a>                 |
| Interpretation   | 20 | Give a cautious overall interpretation of results considering objectives, limitations, multiplicity of analyses, results from similar studies, and other relevant evidence<br><a href="#">See pages 21-24.</a> |
| Generalisability | 21 | Discuss the generalisability (external validity) of the study results<br><a href="#">See page 25.</a>                                                                                                          |

**Other information**

|         |    |                                                                                                                                                                                                                                                                                      |
|---------|----|--------------------------------------------------------------------------------------------------------------------------------------------------------------------------------------------------------------------------------------------------------------------------------------|
| Funding | 22 | Give the source of funding and the role of the funders for the present study and, if applicable, for the original study on which the present article is based<br><a href="#">No specific funding, so a general funding statement is included in the acknowledgements on page 26.</a> |
|---------|----|--------------------------------------------------------------------------------------------------------------------------------------------------------------------------------------------------------------------------------------------------------------------------------------|

\*Give information separately for exposed and unexposed groups.

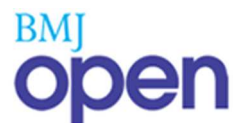

**Radiation oncology outpatient perceptions of patient-centred care: A cross-sectional survey**

|                                 |                                                                                                                                                                                                                                                                                                                                                                                                                                                                                                                                                          |
|---------------------------------|----------------------------------------------------------------------------------------------------------------------------------------------------------------------------------------------------------------------------------------------------------------------------------------------------------------------------------------------------------------------------------------------------------------------------------------------------------------------------------------------------------------------------------------------------------|
| Journal:                        | <i>BMJ Open</i>                                                                                                                                                                                                                                                                                                                                                                                                                                                                                                                                          |
| Manuscript ID:                  | bmjopen-2012-001265.R1                                                                                                                                                                                                                                                                                                                                                                                                                                                                                                                                   |
| Article Type:                   | Research                                                                                                                                                                                                                                                                                                                                                                                                                                                                                                                                                 |
| Date Submitted by the Author:   | 06-Dec-2012                                                                                                                                                                                                                                                                                                                                                                                                                                                                                                                                              |
| Complete List of Authors:       | Mackenzie, Lisa; The University of Newcastle, Priority Research Centre for Health Behaviour, School of Medicine and Public Health<br>Sanson-Fisher, Rob; The University of Newcastle, Priority Research Centre for Health Behaviour, School of Medicine and Public Health<br>Carey, Mariko; The University of Newcastle, Priority Research Centre for Health Behaviour, School of Medicine and Public Health<br>D'Este, Catherine; The University of Newcastle, Centre for Clinical Epidemiology and Biostatistics, School of Medicine and Public Health |
| <b>Primary Subject Heading</b>: | Patient-centred medicine                                                                                                                                                                                                                                                                                                                                                                                                                                                                                                                                 |
| Secondary Subject Heading:      | Health services research, Oncology, Patient-centred medicine                                                                                                                                                                                                                                                                                                                                                                                                                                                                                             |
| Keywords:                       | Patient-Centered Care, Cross-Sectional Studies, Neoplasms, Radiation oncology < RADIOLOGY & IMAGING, Health Care Quality, Access, and Evaluation                                                                                                                                                                                                                                                                                                                                                                                                         |
|                                 |                                                                                                                                                                                                                                                                                                                                                                                                                                                                                                                                                          |

SCHOLARONE™  
Manuscripts

Only

**MANUSCRIPT TITLE:** Radiation oncology outpatient perceptions of patient-centred care: A cross-sectional survey

**SHORT TITLE:** Patient-centred cancer care

**Author names, degrees and affiliations:**

L. J. Mackenzie *BPsych (Hons)*<sup>1</sup>

R. W. Sanson-Fisher *PhD*<sup>1</sup>

M. L. Carey *D.Psych*<sup>1</sup>

C. A. D'Este *PhD*<sup>2</sup>

1. Priority Research Centre for Health Behaviour, School of Medicine and Public Health, Faculty of Health, University of Newcastle, Newcastle, Australia

2. Centre for Clinical Epidemiology and Biostatistics, School of Medicine and Public Health, Faculty of Health, University of Newcastle, Newcastle, Australia

**Address correspondence and reprints to:**

Ms Lisa Mackenzie

Health Behaviour Research Group  
The University of Newcastle  
HMRI Building, c/-University Drive,  
Callaghan NSW 2308 Australia  
T: +61 2 4913 8682  
F: +61 2 4913 8779  
E: [Lisa.Mackenzie@uon.edu.au](mailto:Lisa.Mackenzie@uon.edu.au)

**Key words:**

Patient-Centered Care  
Cross-Sectional Studies  
Neoplasms  
Radiation Oncology  
Health Care Quality, Access, and Evaluation

**Article type:** Research article

**Word count (excluding title page, abstract, references, figures and tables):** 4304

**Text pages (including title page, tables, figure and references):** 38

**Tables:** 4

**Figures:** 1

**References:** 56

**ABSTRACT:**

**Objectives.** We aimed to describe the proportion and characteristics of cancer patients who perceived that better care would have greatly improved their wellbeing in a) specific, and b) multiple domains of patient-centred care.

**Design.** Cross sectional touchscreen computer survey.

**Setting.** Four Australian radiation therapy departments located within major urban public hospitals.

**Participants.** Radiation therapy outpatients were invited to participate in a touchscreen computer survey. Eligible patients were aged at least 18 years old, diagnosed with cancer, and had sufficient English to complete the survey.

**Primary outcome measure.** Participants were asked whether their wellbeing could have been greatly improved if better care had been provided across eight domains of patient-centred care. Characteristics of those respondents who identified a) specific and b) multiple domains where it was perceived that better care would have greatly improved their well-being, were examined.

**Results.** Of 508 eligible radiation therapy patients, 344 (68%) completed the survey. Patients most frequently perceived that better care in the following domains could have improved their wellbeing: information and communication about their cancer (22%; 95% CI: 18-27%); emotional and spiritual support (22%; 95% CI: 18-27%); management of physical symptoms (21%; 95% CI: 17-26%); and involvement of friends

1  
2  
3 and family (21%; 95% CI: 17-26%). Just under one third of respondents (31%; 95% CI:  
4  
5 26-36%) indicated that their wellbeing could have been improved by better care across  
6  
7 two or more domains of care. Patients in younger age groups and migrants to Australia  
8  
9 had higher odds of endorsing multiple domains where better care would have improved  
10  
11 their wellbeing.  
12

13  
14  
15  
16 **Conclusions.** Further investigation of patients' perceptions regarding how their  
17  
18 perceived quality might be improved is warranted, particularly amongst patients in  
19  
20 younger age groups and migrants to Australia.  
21  
22  
23  
24  
25  
26  
27  
28  
29  
30  
31  
32  
33  
34  
35  
36  
37  
38  
39  
40  
41  
42  
43  
44  
45  
46  
47  
48  
49  
50  
51  
52  
53  
54  
55  
56  
57  
58  
59  
60

For peer review only



## INTRODUCTION.

### **Why assess patient views of quality of care?**

The Institute of Medicine (IOM) in the United States of America, an independent organisation for gathering evidence to assist health decision making, has indicated the urgency of assessing and improving the quality of health care [1]. Quality health care is care that is safe, timely, effective, efficient, equitable and patient-centred [2]. A patient-centred approach to care is defined as being respectful of, and responsive to, patients' physical, social and emotional preferences and needs [3]. Provision of patient-centred care may contribute to improvements in patients' physical, mental and social well-being [4 5]. A patient-centred approach to care is now endorsed as a key component of quality health care by many organisations (including the World Health Organisation [6]) and governments (e.g. in Australia, USA, UK, Canada, Germany, France, Netherlands and Switzerland [7]). Although quality of care is often examined through audit and benchmarking of clinical outcomes data [8], examining patients' judgements of how their experiences of care correspond with their preferences and needs is required in order to assess the quality of patient-centred care [9].

### **What has previous patient-centred care research contributed to knowledge about prioritising quality improvement efforts?**

Quality of patient-centred care has been assessed using a variety of patient reported outcomes measures including surveys of patient satisfaction and experiences which are closely linked to the IOM patient-centred care conceptual framework [10 12]. Patient satisfaction surveys' have been criticised because responses may be heavily dependent upon patients' expectations of care, leading to the development of patient experience

1  
2  
3 surveys [12]. The Picker Institute survey assesses outpatients' experiences of care  
4  
5 across the domains of patients' preferences; emotional support; physical comfort;  
6  
7 information and education; coordination of care; access to care; and involvement of  
8  
9 family/friends [11 12 15]. More recently, indicators of the quality of patient-centred  
10  
11 care have been developed from international patient-centred oncology clinical practice  
12  
13 guidelines [10 16]. These indicators have been grouped across the domains of  
14  
15 information; coordination/organisation of care; physical support; emotional and  
16  
17 psychological support; communication and respect; involvement; access; and follow-  
18  
19 up/after-care. To date, these approaches have not attempted to capture patient  
20  
21 perceptions of the degree to which their wellbeing would benefit from improved care  
22  
23 across these different domains [14]. Drawing upon the formal supportive care needs  
24  
25 assessment approach which aims to identify the level of patient need for help [17],  
26  
27 identification of patients' views of the relative benefit that would be conferred by  
28  
29 improvements in different patient-centred domains care may assist with identifying and  
30  
31 prioritising quality improvement efforts [10].  
32  
33  
34  
35  
36  
37  
38

39 Some subgroups of patients may perceive that they receive poorer care than others. For  
40  
41 instance, older patients may be more likely than younger patients to express satisfaction  
42  
43 with care, possibly relating to differences in the expectations for care provision [18].  
44  
45 Additionally, cancer patients who have clinically significant levels of anxiety have been  
46  
47 found to give lower ratings of satisfaction with care [19]. Wellbeing in patients  
48  
49 diagnosed with chronic illness may be linked to aspects of social support such as having  
50  
51 a partner, [20] and also potentially to ethnicity [21]. Given that there is some evidence  
52  
53 of increased psychological distress and supportive care needs prior to and during  
54  
55  
56  
57  
58  
59  
60

1  
2  
3 treatment [22 23], it may also be that treatment stage may impact on perceptions of  
4  
5 care.  
6

### 7 **Patient-centred care for radiation therapy patients**

8  
9 It is recommended that approximately 50% of cancer patients undergo radiation  
10  
11 therapy treatment [24]. Given that this treatment is often characterised by frequent  
12  
13 contact with the healthcare system over the course of treatment, the radiation therapy  
14  
15 setting provides an opportunity for addressing patient perceived needs across the  
16  
17 multiple domains of patient-centred care [24]. Although research into specific domains  
18  
19 and specific cancer types has been conducted in radiotherapy settings [22 25 26], to the  
20  
21 best of our knowledge, this is the first study to ask cancer patients undergoing radiation  
22  
23 therapy about their perceptions of how better care across multiple patient-centred  
24  
25 domains could improve their wellbeing [27]. Further, no previous studies have  
26  
27 identified characteristics of radiation therapy patients who are likely to perceive better  
28  
29 patient-centred care [28].  
30  
31  
32  
33  
34  
35  
36

37 This study aimed to examine the proportion and characteristics of radiation therapy  
38  
39 patients who indicate that their well-being could have been greatly improved by better  
40  
41 cancer care across each of eight domains of patient-centred care. We also aimed to  
42  
43 assess characteristics associated with a patient perception that better care across  
44  
45 multiple domains of patient-centred care would have improved their well-being.  
46  
47  
48  
49

## 50 **METHODS.**

### 51 **Ethics approvals**

52  
53 Ethics approval was obtained from the University of Newcastle and NSW Population &  
54  
55 Health Services Research Ethics Committees.  
56  
57  
58  
59  
60

## Design

Cross sectional survey completed using touchscreen computers.

## Participants

Radiation oncology outpatients were recruited from four radiation therapy departments in a major urban centre in Australia between March and December 2010. Each radiation therapy department was attached to a major public teaching hospital, and had at least three Linear Accelerators available for treatment. Eligible patients were aged 18 years or older; diagnosed with cancer; and had sufficient command of English to complete the touchscreen computer survey. Patients who were receiving both radical and palliative treatment were eligible. Those who were attending the clinic for the first time or who were considered by clinic staff to be too unwell or unable to give informed consent were excluded.

## Procedure

Patients waiting for a radiation therapy treatment were invited to participate in the study by a research assistant. Consenting patients were given a unique identification code to login to the touchscreen computer questionnaire. If patients were called into their treatment before finishing their survey, they had the option of resuming after their treatment. Touchscreen computer surveys have been reported as being faster and easier to use for outpatients than pencil and paper surveys,[29] and have been found to be acceptable to oncology patients [30].

## Measures

1  
2  
3 Digivey survey software (CREOSO - Digivey Survey Center, Phoenix, Arizona) was used  
4  
5 to program the patient survey, which was administered using Dell Latitude XT2  
6  
7 touchscreen laptop computers.  
8  
9

10  
11  
12 Quality of Care: patient-centred care.

13  
14 Questions and domain descriptions were developed to correspond with domains of  
15  
16 patient-centred care described in the literature,[10 12] ensuring face validity of the  
17  
18 items and clinical relevance to patients currently undergoing treatment. Survey items  
19  
20 were extensively pilot tested and modified based on feedback from 67 patients. Eight  
21  
22 items, each assessing a different domain of care, were presented on separate screens  
23  
24 with the stem "During my cancer care, my well-being would have been greatly improved  
25  
26 by." Table 1 lists the eight items and a short description of each domain that was  
27  
28 presented at the bottom of the touchscreen. Patients were asked to indicate their level of  
29  
30 agreement with each statement on a 4-point Likert scale (Strongly disagree, Disagree,  
31  
32 Agree, Strongly agree). Internal consistency of the items was assessed using Cronbach's  
33  
34  
35  
36  
37 alpha.  
38  
39  
40  
41  
42  
43  
44  
45  
46  
47  
48  
49  
50  
51  
52  
53  
54  
55  
56  
57  
58  
59  
60

only

Table 1. Survey items and descriptions (each assessing a different domain of care)

| Item                                                                  | On screen description                                                                                                                                                       |
|-----------------------------------------------------------------------|-----------------------------------------------------------------------------------------------------------------------------------------------------------------------------|
| <b>Better management of my physical symptoms</b>                      | May relate to your pain, sleeplessness, other side-effects and symptoms.                                                                                                    |
| <b>Better information and communication about my cancer and care</b>  | May include: clear and consistent information about your diagnosis, test results, treatment, taking medications, food you should be eating, exercise you can do safely etc. |
| <b>Better emotional and/or spiritual support</b>                      | May include services or support to help you cope with: the impact of cancer on your life, doubts/worries, feelings of anxiety or sadness, changes to your body images etc.  |
| <b>Better services, information and support for my friends/family</b> | May include helping them to cope with the impact of your cancer, or providing opportunities for them to be involved in your care.                                           |
| <b>Better staff approachability and respect for me</b>                | Describes staff who are easy to contact and up-to-date with your medical history, and who give you opportunities to ask questions and be involved in treatment decisions.   |

|                                                                         |                                                                                                                                                                                    |
|-------------------------------------------------------------------------|------------------------------------------------------------------------------------------------------------------------------------------------------------------------------------|
| <b>Getting better access to the care I need when required</b>           | Describes not having to wait too long to get appointments, and having treatment and medical advice available when needed.                                                          |
| <b>Better services/support to cope with changes to my relationships</b> | May include: knowing what changes to expect, and having some strategies to reduce the impact of cancer on your work, usual social activities, friendships or sexual relationships. |
| <b>Better services/advice to assist me with practical concerns</b>      | May include being able to access financial support, transport to treatment, home help services or other support needed to manage practical issues.                                 |

Demographic characteristics.

Patient self-report was used to collect age, gender, whether participants were born in Australia, living with a partner and the postcode of usual place of residence.

Disease characteristics.

A multiple choice question "What is your most recent primary cancer diagnosis?" was used to determine respondents' most recent primary cancer diagnosis. Common cancer types were listed on screen, along with the categories "other - please specify" and "don't know". Approximate time since diagnosis was calculated from patient self-reported year and month of diagnosis and their recruitment date. Patients were asked to indicate the number of radiation therapy treatment and outpatient appointments they had attended; whether they had experienced a second diagnosis and/or recurrence, and whether they

1  
2  
3 perceived that the aim of their treatment was to cure the cancer; prevent the cancer  
4  
5 from coming back or control symptoms of cancer (cure is not possible).  
6  
7

8  
9  
10 Psychological characteristics.

11  
12 The Hospital Anxiety and Depression Scale (HADS) is a 14-item self-report measure of  
13  
14 anxiety and depression [31]. Both the anxiety and depression subscales provide scores  
15  
16 of between 0 and 21 where 0-7= Normal; 8-10= Mild; 11-14 = Moderate; 15-21 = Severe.  
17  
18 The scale has been utilised in research and in clinical practice,[32] with demonstrated  
19  
20 reliability and validity [33]. HADS scores have been found to be comparable when  
21  
22 administered by touchscreen computer and pen-and-paper in a cancer patient  
23  
24 population [34].  
25  
26  
27  
28  
29

### 30 **Statistical Methods**

31  
32 Radiation therapy patients were defined as having endorsed each domain if they  
33  
34 indicated that they “agreed” or “strongly agreed” that better care would have greatly  
35  
36 improved their well-being. The proportion of patients endorsing each domain was  
37  
38 reported with 95% confidence intervals. Respondents were then dichotomised on the  
39  
40 basis of: a) 0-1 domains endorsed or b) multiple (2 or more) domains endorsed.  
41  
42 Univariate logistic analysis was used to investigate the relationship between  
43  
44 demographic characteristics, disease factors and psychological distress and patient  
45  
46 endorsement of a) each of the 8 domains of care and b) multiple (2 or more) domains of  
47  
48 care requiring improvement. The explanatory variables examined included age (18-49,  
49  
50 50-59, 60-69, 70 plus), sex (male, female), cancer diagnosis (Breast, Prostate,  
51  
52 Other/Don’t Know), second diagnosis and/or recurrence (no, yes), Australian born (no,  
53  
54 yes), living with a partner (no, yes), anxiety (no, yes), depression (no, yes), usual place of  
55  
56  
57  
58  
59  
60



1  
2  
3 residence (urban/rural, based on Accessibility/Remoteness Index of Australia (ARIA+)  
4 score), socioeconomic status (Socio-Economic Indexes for Areas (SEIFA) average  
5 scores[35]), and number of radiotherapy treatment appointments attended (continuous  
6 measure). Variables with a *p* value of 0.2 or less on the univariate likelihood ratio test  
7 were included in the multiple logistic regression model. The backwards stepwise  
8 method was then used to remove all variables with a *p* value of 0.1 or more on the  
9 likelihood ratio test, with recruitment site included in all multiple regression models.  
10 The fit of the final model was assessed using the Hosmer-Lemeshow goodness of fit test.  
11 For individual domains, odds ratios with 95% confidence intervals are reported for  
12 multiple regression models. For the assessment of characteristics associated with  
13 endorsing multiple domains, odds ratios with 95% confidence intervals are reported for  
14 univariate and multiple regression models. Analysis was conducted using STATA version  
15 11.2, and a significance level of 0.05 used.  
16  
17  
18  
19  
20  
21  
22  
23  
24  
25  
26  
27  
28  
29  
30  
31  
32  
33  
34

### 35 **Sample size and statistical power**

36 We aimed to recruit a total of 450 patients which, based on 50% of patients perceiving  
37 the need for better care in each domain, would allow us to obtain prevalence estimates  
38 with 95% CI's within  $\pm 5\%$  of the point estimate. This sample size would also be  
39 sufficient to detect differences of approximately 15% in characteristics between those  
40 who perceive the need for better care in each individual domain and also multiple  
41 domains of care with 80% power and 5% significance level.  
42  
43  
44  
45  
46  
47  
48  
49  
50  
51

### 52 **RESULTS.**

53 Of the 639 patients screened for eligibility, 110 were ineligible due to: inadequate  
54 English (n=51); not currently receiving RT (n = 32); had already been approached about  
55  
56  
57  
58  
59  
60

1  
2  
3 the study (n = 6); not being diagnosed with cancer (n = 3); clinic staff concern about  
4  
5 patient burden or ability to give informed consent (n = 3); being aged under 18 (n = 2),  
6  
7 or no specified reason (n=13). Of the 529 eligible patients, 85% (n = 451) consented, and  
8  
9 69% (n = 365) completed the survey. Incomplete surveys were primarily because  
10  
11 patients were called into their treatment appointment before survey completion, and no  
12  
13 data was available from these surveys. An additional 21 patients were excluded because  
14  
15 they reported that they were attending their first RT treatment. Once these participants  
16  
17 were ruled ineligible, the overall response rate was 68% of 508 eligible radiation  
18  
19 therapy patients. Table 2 shows the characteristics of the 344 respondents. 51% were  
20  
21 male, the median age was 63.3 (Quartile [Q] 1: 52.2, Q3: 70.5) and the median number of  
22  
23 weeks since diagnosis was 27.6 (Q1: 16.0, Q3: 57.3). The majority of respondents (97%)  
24  
25 were currently receiving radiation therapy treatment, with the remainder reporting that  
26  
27 they were attending the treatment centre for a check-up. The distribution of primary  
28  
29 cancer type within the sample can be seen in Table 2.  
30  
31  
32  
33  
34  
35  
36  
37  
38  
39  
40  
41  
42  
43  
44  
45  
46  
47  
48  
49  
50  
51  
52  
53  
54  
55  
56  
57  
58  
59  
60

Table 2. Demographic and disease characteristics of respondents (*n* = 344)

| Characteristic                                   | Mean (min, max)        |
|--------------------------------------------------|------------------------|
| Age (years)                                      | 61.4 (18.9-91.4)       |
|                                                  | <i>n</i> (%)           |
| Males                                            | 176 (51%)              |
| <b>Region of birth</b>                           |                        |
| Australia                                        | 231 (67%)              |
| UK/Ireland                                       | 30 (8.7%)              |
| Europe                                           | 29 (8.4%)              |
| Asia                                             | 25 (7.2%)              |
| Other                                            | 29 (8.4%)              |
| <b>Perceived palliative treatment aim</b>        | 46 (14%)               |
| <b>Primary cancer type</b>                       |                        |
| Breast                                           | 93 (27%)               |
| Prostate                                         | 73 (21%)               |
| Head and neck                                    | 33 (9.6%)              |
| Colorectal                                       | 20 (5.8%)              |
| Brain                                            | 15 (4.4%)              |
| Lung                                             | 15 (4.4%)              |
| Other                                            | 89 (26%)               |
| Don't know                                       | 6 (1.7%)               |
| <b>Second diagnosis/recurrence</b>               | 96 (28%)               |
|                                                  | <b>Median (Q1, Q3)</b> |
| <b>Completed appointments with cancer doctor</b> | 3 (2, 5)               |

|                                                 |                 |
|-------------------------------------------------|-----------------|
| <b>Completed radiation therapy appointments</b> | 9 (4, 17)       |
| <b>Weeks since diagnosis</b>                    | 27.6 (16, 37.3) |

*Note.* Observations within each variable may not add to the total due to missing values

### Internal consistency of items

When considering the items with responses on a 4-point Likert scale, the internal consistency (Cronbach's  $\alpha$ ) was 0.92. When the responses were dichotomised (agree versus disagree), Cronbach's  $\alpha$  was 0.89.

### Proportion of patients endorsing individual domains of patient-centred care

Table 3 shows the number and proportion of radiation oncology patients who agreed that their well-being could have been improved by better care across 8 different domains of patient-centred care. It can be seen that each domain was endorsed by between 12% and 22% of patients.

**Table 3. Proportion who reported that their wellbeing would have been improved by better care across 8 domains ( $n = 344$ )**

|                                                                | <b>Agree</b>                |
|----------------------------------------------------------------|-----------------------------|
|                                                                | <b><i>n</i> (%), 95% CI</b> |
| <b>Information and communication about my cancer and care</b>  | 76 (22%, 18-27%)            |
| <b>Emotional and/or spiritual support</b>                      | 75 (22%, 18-27%)            |
| <b>Management of my physical symptoms</b>                      | 72 (21%, 17-26%)            |
| <b>Services; information and support for my friends/family</b> | 72 (21%, 17-26%)            |

|                                                                  |                   |
|------------------------------------------------------------------|-------------------|
| <b>Services/advice to assist me with practical concerns</b>      | 69 (20%, 16-25%)  |
| <b>Access to the care I need when required</b>                   | 62 (18%, 14-23%)  |
| <b>Services/support to cope with changes to my relationships</b> | 56 (16%, 13-21%)  |
| <b>Staff approachability and respect for me</b>                  | 42 (12%, 8.9-16%) |

### Characteristics associated with endorsement of domains

Multiple logistic regression analysis identified that Australian born participants had lower odds of endorsing perceiving “better management of physical symptoms” would have greatly improved their well-being (OR = 0.4; 95% CI: 0.2-0.7;  $p = 0.0008$ ). No other characteristics were significantly associated with endorsing better management of physical symptoms.

Better information and communication about my cancer and care: Australian born patients had lower odds of perceiving that “better information and communication about my cancer and care” would have greatly improved their well-being (OR = 0.5; 95% CI: 0.3-0.9;  $p = 0.0153$ ), as did patients living with a partner (OR = 0.5; 95% CI: 0.3-0.8;  $p = 0.0083$ ). It was also found that patients aged 60-69 years (OR = 0.3; 95% CI: 0.1-0.7) and aged 70 or over (OR = 0.3; 95% CI: 0.2-0.8) had lower odds of endorsing this domain than younger participants ( $p = 0.0042$ ). Patients with a likely presence of depression had three times the odds of endorsing this domain (OR = 3.1; 95% CI: 1.1-9.0;  $p = 0.0396$ ).

1  
2  
3 Better emotional and/or spiritual support: Patients aged 60-69 years (OR = 0.3; 95% CI:  
4 0.1-0.6) and aged 70 or over (OR = 0.4; 95% CI: 0.2-0.8) had lower odds of endorsing  
5 this domain than younger participants ( $p = 0.0011$ ). Australian born patients had lower  
6 odds of endorsing this domain (OR = 0.3; 95% CI: 0.2-0.5;  $p < 0.0001$ ), whilst patients  
7 with clinically significant levels of depression had higher odds of endorsing (OR = 3.5;  
8 95% CI: 1.2-10.1;  $p = 0.0250$ ).  
9  
10  
11  
12  
13  
14  
15  
16  
17  
18

19 Better services, information and support for my friends/family: Lower odds of  
20 endorsing this domain were found in older patients aged 60-69 years (OR = 0.2; 95% CI:  
21 0.1-0.5) and aged 70 or over (OR = 0.2; 95% CI: 0.1-0.4) compared to younger  
22 participants ( $p < 0.0001$ ), and also in Australian born patients (OR = 0.4; 95% CI: 0.2-0.6;  
23  $p = 0.0004$ ).  
24  
25  
26  
27  
28  
29  
30  
31

32 Better staff approachability and respect for me: Australian born patients had  
33 significantly lower odds of endorsing this domain (OR = 0.3; 95% CI: 0.1-0.5;  $p =$   
34 0.0001). Marginally non-significantly lower odds of endorsing this domain were found in  
35 older patients aged 60-69 years (OR = 0.3; 95% CI: 0.1-0.9) compared to younger  
36 participants ( $p = 0.0683$ ).  
37  
38  
39  
40  
41  
42  
43  
44  
45

46 Getting better access to the care I need when required: Older patients aged 60-69 years  
47 (OR = 0.2; 95% CI: 0.1-0.5) and aged 70 or over (OR = 0.3; 95% CI: 0.1-0.8) had lower  
48 odds of endorsing this domain compared to younger participants ( $p = 0.0003$ ). Once  
49 again, Australian born patients had lower odds of endorsing this domain (OR = 0.3; 95%  
50 CI: 0.2-0.6;  $p = 0.0003$ ). Marginally non-significantly lower odds were also found in  
51  
52  
53  
54  
55  
56  
57  
58  
59  
60

1  
2  
3 socioeconomic Group 2 (OR = 0.2; 95% CI: 0.1-0.9) and Group 3 (OR = 0.3; 95% CI: 0.1-  
4  
5 0.9) compared to the lowest SES Group 1 ( $p = 0.0837$ ).  
6  
7

8  
9  
10 Better services/support to cope with changes to my relationships: Older patients aged  
11  
12 60-69 years (OR = 0.1; 95% CI: 0.1-0.4) and aged 70 or over (OR = 0.2; 95% CI: 0.1-0.4)  
13  
14 had lower odds of endorsing this domain compared to younger participants ( $p <$   
15  
16 0.0001). Once again, Australian born patients had lower odds of endorsing this domain  
17  
18 (OR = 0.3; 95% CI: 0.1-0.5;  $p = 0.0001$ ). Patients with clinically significant levels of  
19  
20 depression had higher odds of endorsing this domain (OR = 7.2; 95% CI: 2.3-22.5;  $p =$   
21  
22 0.0007).  
23  
24

25  
26  
27 Better services/advice to assist me with practical concerns: Older patients aged 60-69  
28  
29 years (OR = 0.1; 95% CI: 0.1-0.3) and aged 70 or over (OR = 0.3; 95% CI: 0.1-0.6) had  
30  
31 lower odds of endorsing this domain compared to younger participants ( $p < 0.0001$ ).  
32  
33 Australian born patients also had lower odds of endorsing this domain (OR = 0.5; 95%  
34  
35 CI: 0.3-0.8;  $p = 0.0070$ ).  
36  
37  
38

### 39 40 41 **Proportion of patients endorsing multiple domains where better care would have** 42 43 **improved their well-being** 44

45  
46 Figure 1 shows the percentage of respondents endorsing none, one and multiple  
47  
48 domains where better care would have improved their wellbeing. Overall 31% of  
49  
50 respondents ( $n = 107$ ) endorsed multiple domains where they agreed or strongly agreed  
51  
52 that their wellbeing could have been improved by better care.  
53  
54

55  
56  
57 FIGURE 1 ABOUT HERE  
58  
59  
60

For 55% of participants, it was perceived that improvement in well-being would not have resulted from better care in any of the examined domains. Fourteen percent of participants identified only one domain where better care would have greatly improved their well-being. Table 4 shows the results of analyses examining factors associated with the perception that wellbeing could have been improved by better care in multiple (2 or more) domains. It can be seen that compared with the younger age group (18-49 years), being aged 60 years or over was associated with significantly lower odds of endorsing multiple domains as requiring improvement. Additionally, relative to patients not born in Australia, those who were Australian born had significantly lower odds of endorsing multiple domains in which wellbeing would have been improved by better care. Outpatients living with a partner had significantly lower odds of identifying multiple domains where better care would have greatly improved their wellbeing. There were significantly higher odds of endorsing multiple domains amongst outpatients with a likely presence of anxiety.

**Table 4. Demographic, disease and HADS associations with endorsement of multiple domains as requiring improvement¶**

|                 | <b>Multiple domains endorsed</b> | <b>LR Chi<sup>2</sup>, p</b> | <b>LR Chi<sup>2</sup>, p</b> |
|-----------------|----------------------------------|------------------------------|------------------------------|
|                 | <b>n (%)</b>                     | <b>Unadjusted</b>            | <b>Adjusted</b>              |
|                 |                                  | <b>OR (95% CI)   </b>        | <b>OR (95% CI)   </b>        |
| <b>Hospital</b> |                                  | <b>5.0, p = 0.1752</b>       | <b>2.9, p = 0.4002</b>       |
| Site 1          | 36 (36%)                         | 1.0                          | 1.0                          |



|                                       |          |                           |                         |
|---------------------------------------|----------|---------------------------|-------------------------|
| Site 2                                | 22 (23%) | 0.5 (0.3-1.0)             | 0.6 (0.3-1.2)           |
| Site 3                                | 23 (32%) | 0.8 (0.4-1.6)             | 0.9 (0.4-1.8)           |
| Site 4                                | 26 (34%) | 0.9 (0.5-1.7)             | 1.0 (0.5-2.0)           |
| <b>Age category</b>                   |          | <b>35.9, p &lt;0.0001</b> | <b>28.9, p</b>          |
| 18-49 years                           | 36 (51%) | 1.0                       | <b>&lt;0.0001*</b>      |
| 50-59 years                           | 34 (46%) | 0.8 (0.4-1.5)             | 1.0                     |
| 60-69 years                           | 20 (18%) | 0.2 (0.1-0.4)             | 0.7 (0.4-1.4)           |
| 70 years plus                         | 17 (19%) | 0.2 (0.1-0.4)             | 0.2 (0.1-0.4)           |
|                                       |          |                           | 0.2 (0.1-0.5)           |
| <b>Sex§</b>                           |          | <b>2.5, p = 0.1159</b>    |                         |
| Male                                  | 48 (27%) | 1.0                       |                         |
| Female                                | 59 (35%) | 1.4 (0.9-2.3)             |                         |
| <b>Cancer type§</b>                   |          | <b>3.8, p = 0.1469</b>    |                         |
| Breast                                | 31 (33%) | 1.0                       |                         |
| Prostate                              | 16 (22%) | 0.6 (0.3-1.1)             |                         |
| Other cancer types†                   | 60 (34%) | 1.0 (0.6-1.7)             |                         |
| <b>Second diagnosis or recurrence</b> |          | <b>1.0, p = 0.3123</b>    |                         |
| No                                    | 81 (33%) | 1.0                       |                         |
| Yes                                   | 26 (27%) | 0.8 (0.5-1.3)             |                         |
| <b>Born in Australia</b>              |          | <b>8.5, p = 0.0037</b>    | <b>5.4, p = 0.0205*</b> |
| No                                    | 47 (42%) | 1.0                       | 1.0                     |
| Yes                                   | 60 (26%) | 0.5 (0.3-0.8)             | 0.5 (0.3-0.9)           |
| <b>Socioeconomic status</b>           |          | <b>0.3, p = 0.5758</b>    |                         |
| Low                                   | 5 (22%)  | 1.0                       |                         |

|                                                 |          |                                          |               |
|-------------------------------------------------|----------|------------------------------------------|---------------|
| Medium                                          | 8 (16%)  | 0.7 (0.2-2.4)                            |               |
| High                                            | 59 (22%) | 1.0 (0.4-2.9)                            |               |
| <b>Usual place of residence</b>                 |          | <b>0.3, p = 0.5758</b>                   |               |
| Major city                                      | 87 (32%) | 1.0                                      |               |
| Regional or rural                               | 19 (28%) | 0.8 (0.5-1.5)                            |               |
| <b>Living with partner</b>                      |          | <b>5.2, p = 0.0224 3.9, p = 0.0481*</b>  |               |
| No                                              | 50 (38%) | 1.0                                      | 1.0           |
| Yes                                             | 57 (27%) | 0.6 (0.4-0.9)                            | 0.6 (0.4-1.0) |
| <b>Clinically significant anxiety‡</b>          |          | <b>10.4, p = 0.0013 4.3, p = 0.0383*</b> |               |
| No                                              | 82 (28%) | 1.0                                      | 1.0           |
| Yes                                             | 25 (52%) | 2.8 (1.5-5.2)                            | 2.1 (1.0-4.1) |
| <b>Clinically significant depression‡§</b>      |          | <b>5.7, p = 0.0167</b>                   |               |
| No                                              | 97 (30%) | 1                                        |               |
| Yes                                             | 10 (59%) | 3.3 (1.2-9.0)                            |               |
| <b>Completed radiation therapy appointments</b> |          | <b>0.02, p = 0.8893</b>                  |               |

*Note.* Observations within each variable may not add to the total due to missing values

†Including brain, colorectal, head and neck, lung, non-Hodgkin's lymphoma, and other cancer types

‡Assessed using the Hospital Anxiety and Depression Scale (HADS)

§Eliminated during backwards stepwise multiple logistic regression analysis

|| Reported *p*-values are from the Likelihood ratio test

¶ *p*-values for the Hosmer-Lemeshow goodness of fit test were between 0.2 and 0.9 for specific domain models; and was 0.1 for the multiple domain model

## DISCUSSION

### **In which domains would better care greatly improve wellbeing for the most patients?**

For each of the eight domains of care assessed, between 12-22% of respondents agreed or strongly agreed that their wellbeing would have greatly improved with better care.

One fifth or more agreed that improvements to the following domains would have improved their care: better information and communication about my cancer and care (22%); better emotional and/or spiritual support (22%); better management of physical symptoms (21%); better services information and support for friends/family (21%); and better services/advice to assist with practical concerns (20%). Overall, these frequencies were lower than identified in comparable domains in recent international studies of cancer patient experiences of care in Australia, New Zealand, British Columbia, Canada and Europe [10 11 19 36 37]. This discrepancy may be a consequence of the differences in measures. Although past measures have assessed experiences of care or unmet need, they have not assessed the impact that patients perceive better care in these patient-centred domains would have on their wellbeing. Alternatively, the discrepancies between findings may be a result of improved delivery of patient centred care over time.

### **Characteristics associated with endorsing each domain of patient-centred care**

#### Country of birth

Australian born patients had lower odds of endorsing each of the assessed domains of patient-centred care. It may be that Australian born patients perceive that they are receiving better care than migrants. Alternatively, it may be that Australian born

1  
2  
3 patients have lower expectations of care and of the degree to which their well-being  
4  
5 would be improved by better care [38]. Linguistic and cultural barriers to patient  
6  
7 perceptions of high quality health care have been previously identified, highlighting the  
8  
9 need for responsiveness to cultural background for optimal health care delivery [38].  
10  
11 Although the current research was limited to patients with adequate English to complete  
12  
13 the survey, there has been increased research attention on some of these challenges  
14  
15 faced by people with cancer from culturally and linguistically diverse backgrounds in  
16  
17 Australia [39 40].  
18  
19

#### 20 21 22 23 Age group

24  
25 Older age was associated with lower odds of endorsing a need for improvement in all  
26  
27 domains of patient-centred care, with the exception of management of physical  
28  
29 symptoms and staff approachability and respect for the patient. This is consistent with  
30  
31 previous studies suggesting that older age is associated with higher overall patient  
32  
33 satisfaction ratings [41] and that older patients undergoing radiation treatment have  
34  
35 lower information needs [25]. It may be that older patients perceive pain management  
36  
37 and interpersonal care as a traditional role of the doctor, leading to similar perceptions  
38  
39 about the need for improvement in these domains as held by younger age groups.  
40  
41  
42  
43  
44

#### 45 46 HADS classified depression

47  
48 Patients with HADS classified depression had higher odds of endorsing the following  
49  
50 three domains than non-depressed respondents: Information and communication about  
51  
52 cancer and care; emotional and spiritual support; and support with changes to  
53  
54 relationships. A diagnosis of chronic disease with comorbid depression has previously  
55  
56 been associated with perceptions of poor doctor-patient communication [42]. This may  
57  
58  
59  
60

1  
2  
3 be because depressive symptoms such as negative affect may make interactions with  
4 health care providers more strained and less effective than for non-depressed patients  
5 [43 44]. Alternatively it may be that there are patient recall difficulties arising from  
6 depressive symptoms such as poor concentration, leading to negative patient  
7 perceptions of information provision and communication [42].  
8  
9

### 16 Socioeconomic status

17  
18 Higher socioeconomic groups were found to have marginally significantly lower odds of  
19 endorsing issues relating to getting access to care when required. Patients from higher  
20 SES areas may be more likely to live in wealthier urban areas that are closer to health  
21 care facilities, and therefore have less difficulties with access [45]. Given Australia's  
22 dispersed population, access to cancer care service delivery can be challenging for  
23 patients from lower SES areas, particularly those in rural and regional areas. This is  
24 particularly the case for accessing radiation therapy treatment, which is only available in  
25 metropolitan centres and very few major regional centres [46].  
26  
27  
28  
29  
30  
31  
32  
33  
34  
35  
36  
37  
38

### 39 **Multiple domains of patient-centred care: Characteristics of particularly** 40 **vulnerable groups**

41  
42 Overall, 31% of patients indicated that better care in multiple domains of patient-  
43 centred care would have greatly improved their well-being. Older patients had lower  
44 odds of reporting that improvements in their care were needed multiple domains of  
45 care. This finding has been frequently reported in patient satisfaction research [41]. It  
46 has been suggested that this may reflect differences in the expectations or preferences of  
47 care of older people compared to younger people [18]. Consistent with the findings  
48 across the individual domains of care, patients born in Australia had lower odds of  
49  
50  
51  
52  
53  
54  
55  
56  
57  
58  
59  
60

1  
2  
3 endorsing multiple domains where better care would have greatly improved their  
4  
5 wellbeing. This is consistent with findings of lower patient satisfaction has been  
6  
7 reported in migrant groups in international settings [38].  
8  
9

10  
11 A significant trend towards lower odds of reporting improvements in their care were  
12  
13 needed was seen in those respondents living with a partner. Spranger et al [20] reported  
14  
15 that quality of life in individuals with chronic disease was higher amongst those with a  
16  
17 partner. Family members and carers may play an important role in assisting patients to  
18  
19 navigate the health care system and may advocate on the patient's behalf [47]. Patients'  
20  
21 self-management skills may also be complemented by having a support person,[48]  
22  
23 however these findings warrant further exploration in cancer settings [49].  
24  
25  
26  
27  
28  
29

30 As expected, an association was found between clinically significant anxiety levels and  
31  
32 patients' perceptions that their well-being could be improved by better care across  
33  
34 multiple patient-centred domains. This is consistent with findings suggesting that  
35  
36 individuals suffering from elevated levels of anxiety may be more likely to be critical of  
37  
38 the health care system [50]. Alternatively, anxiety may affect interactions with health  
39  
40 care providers and the effectiveness of help seeking behaviours, resulting in the receipt  
41  
42 of poorer care across multiple domains. This finding suggests that there is a need to  
43  
44 identify these patients in clinical practice and reduce their perceived room for  
45  
46 improvement in wellbeing by alleviating their anxiety and improving their perceptions  
47  
48 of care [51]. There have been some partially successful intervention studies conducted  
49  
50 in radiotherapy settings [52 53] and more generally [3] that have aimed to improve  
51  
52 patient-centredness of care.  
53  
54  
55  
56  
57  
58  
59  
60

### Strengths and Limitations

The current study achieved a high consent rate compared to recent research examining cancer outpatient satisfaction with care,[11] and to the best of our knowledge, is also the first large study to assess patient-centred care in radiation therapy outpatients [54].

Heterogeneous cancer sites and stages were included to provide clinics with information about which patient groups may be missing out on elements of patient-centred care. The quality of care measure was developed following extensive pilot testing and with reference to the literature, and the domains have been supported by a recent qualitative study with radiation oncology patients [54]. Therefore, it appears to have face validity as well as internal reliability. However, further examination of its psychometric properties is needed. Demographic information was collected via patient self-report. Accuracy of this method has been questioned,[55] however has been shown to produce reliable responses for these demographic variables,[56] and is a cost effective and feasible way of collecting these data.

It should also be noted that due to extended pilot testing and low survey completion rates, our final sample size was smaller than planned. However, given that the proportion of patients perceiving the need for better care in each domain was lower than expected, we were still able to obtain prevalence estimates with 95% CI's within  $\pm 5\%$  of the point estimate, and detect differences of approximately 15% in characteristics between those who did and did not perceive the need for better care in each domain of care with 80% power and 5% significance level.

### Conclusions

1  
2  
3 Thirty-one percent of respondents identified that better care across multiple domains  
4  
5 would have greatly improved their well-being. “Information and education”, “emotional  
6  
7 and spiritual support”, “management of physical symptoms” and “involvement of friends  
8  
9 and family” were the 4 domains most commonly identified where better care would  
10  
11 have increased respondent well-being. Older patients and patients born in Australia had  
12  
13 significantly lower odds of identifying multiple domains of patient-centred care where  
14  
15 better care would have improved their well-being. This suggests that younger patients  
16  
17 and migrants to Australia appear to be more likely to identify that better care would be  
18  
19 of benefit to their wellbeing. Further investigation of how these factors interact with  
20  
21 wellbeing and the provision of patient-centred care may assist in developing targeted  
22  
23 interventions to improve outcomes for these groups.  
24  
25  
26  
27  
28  
29

### 30 **ACKNOWLEDGEMENTS:**

31  
32 We would like to thank Sundresan Naicker, Jay Roberts, Kelauren Barry and Ryan  
33  
34 Courtney for their assistance with data collection for this study. We would also like to  
35  
36 thank Dr Patrick McElduff, Mr Daniel Barker and Mr Michael Fitzgerald for their  
37  
38 guidance with statistical analysis. We would also like to thank the staff and patients at  
39  
40 the participating radiation oncology treatment centres.  
41  
42  
43  
44  
45

### 46 **COMPETING INTERESTS:**

47  
48 There are no disclosures from any authors.  
49  
50  
51

### 52 **FUNDING STATEMENT:**

53  
54  
55 This research received no specific grant from any funding agency in the public,  
56  
57 commercial or not-for-profit sectors. Lisa Mackenzie’s PhD candidature is supported by  
58  
59  
60



1  
2  
3 The University of Newcastle School of Medicine and Public Health Professor Jill  
4  
5 Cockburn Scholarship in Health Behaviour. Dr. Mariko Carey is supported by a Hunter  
6  
7 Medical Research Institute (HMRI) Fellowship. The touchscreen computer resources and  
8  
9 patient recruitment costs were covered by a 2009 University of Newcastle Priority  
10  
11 Research Centre for Health Behaviour research grant.  
12  
13  
14  
15  
16  
17  
18  
19  
20  
21  
22  
23  
24  
25  
26  
27  
28  
29  
30  
31  
32  
33  
34  
35  
36  
37  
38  
39  
40  
41  
42  
43  
44  
45  
46  
47  
48  
49  
50  
51  
52  
53  
54  
55  
56  
57  
58  
59  
60

For peer review only

**REFERENCE LIST.**

1. Chassin MR, Galvin RW, and the National Roundtable on Health Care Quality. The Urgent Need to Improve Health Care Quality. *JAMA* 1998;**280**(11):1000-05 doi: 10.1001/jama.280.11.1000
2. Institute of Medicine. *Crossing The Quality Chasm: A New Health System for the 21<sup>st</sup> Century*. Washington DC: National Academy Press, 2001.
3. Lewin S, Skea Z, Entwistle VA, et al. Interventions for providers to promote a patient-centred approach in clinical consultations. *Cochrane Database Syst Rev* 2001(4):Art. No.: CD003267. doi: 10.1002/14651858.CD003267
4. Kinmonth AL, Woodcock A, Griffin S, et al. Randomised controlled trial of patient centred care of diabetes in general practice: impact on current wellbeing and future disease risk. The Diabetes Care From Diagnosis Research Team. *BMJ* 1998;**317**(7167):1202-8 doi: 10.1136/bmj.317.7167.1202
5. Epstein RM, Fiscella K, Lesser CS, et al. Why the nation needs a policy push on patient-centered health care. *Health Aff (Millwood)* 2010;**29**(8):1489-95 doi: 10.1377/hlthaff.2009.0888
6. Arah OA, Westert GP, Hurst J, et al. A conceptual framework for the OECD Health Care Quality Indicators Project. *Int J Qual Health Care* 2006;**18**(Suppl 1):5-13 doi: 10.1093/intqhc/mzl024
7. Groene O, Skau JKH, Frølich A. An international review of projects on hospital performance assessment. *Int J Qual Health Care* 2008;**20**(3):162-71 doi: 10.1093/intqhc/mzn008
8. Eden J, Simone JV, editors. *Assessing the quality of cancer care: an approach to measurement in Georgia*. Washington, D.C.: National Academy of Sciences, 2005.

- 1  
2  
3 9. Stewart M. Towards a global definition of patient centred care. *BMJ* 2001;**322**(7284):444-  
4  
5 45 doi: 10.1136/bmj.322.7284.444  
6  
7  
8 10. Ouwens M, Hermens R, Hulscher M, et al. Development of indicators for patient-centred  
9  
10 cancer care. *Support Care Cancer* 2010;**18**(1):121-30 doi: 10.1007/s00520-009-0638-  
11  
12 y  
13  
14 11. Cancer Institute NSW. New South Wales Cancer Patient Satisfaction Survey 2008.  
15  
16 Sydney: Cancer Institute NSW, July 2009.  
17  
18 12. Jenkinson C, Coulter A, Bruster S, et al. Patients' experiences and satisfaction with health  
19  
20 care: results of a questionnaire study of specific aspects of care. *Qual Saf Health Care*  
21  
22 2002;**11**(4):335-39 doi: 10.1136/qhc.11.4.335  
23  
24  
25 13. Goldzweig G, Meirowitz A, Hubert A, et al. Meeting expectations of patients with cancer:  
26  
27 relationship between patient Satisfaction, depression, and coping. *J Clin Oncol*  
28  
29 2010;**28**(9):1560-65 doi: 10.1200/jco.2009.25.4987  
30  
31  
32 14. Carr AJ, Gibson B, Robinson PG. Is quality of life determined by expectations or  
33  
34 experience? *BMJ* 2001;**322**(7296):1240-43 doi: 10.1136/bmj.322.7296.1240  
35  
36  
37 15. Gerteis M, Edgman-Levitan S, Daley J. *Through the Patients' Eyes. Understanding and*  
38  
39 *Promoting Patient-Centred Care* San Francisco, CA: Jossey-Bass, 1993.  
40  
41 16. Uphoff EPMM, Wennekes L, Punt CJA, et al. Development of generic quality indicators  
42  
43 for patient-centered cancer care by using a RAND modified delphi method. **Publish**  
44  
45 **Ahead of Print:**10.1097/NCC.0b013e318210e3a2  
46  
47  
48 17. Bonevski B, Sanson-Fisher R, Girgis A, et al. Evaluation of an instrument to assess the  
49  
50 needs of patients with cancer. 2000;**88**(1):217-25  
51  
52 18. Wan GJ, Counte MA, Cella DF, et al. An analysis of the impact of demographic, clinical,  
53  
54 and social factors on health-related quality of life. *Value Health* 1999;**2**(4):308-18 doi:  
55  
56 10.1046/j.1524-4733.1999.24006.x  
57  
58  
59  
60

- 1  
2  
3 19. Von Essen L, Larsson G, Öberg K, et al. 'Satisfaction with care': associations with  
4 health-related quality of life and psychosocial function among Swedish patients with  
5 endocrine gastrointestinal tumours. *Eur J Cancer Care* 2002;**11**(2):91-99 doi:  
6 10.1046/j.1365-2354.2002.00293.x  
7  
8  
9  
10  
11 20. Sprangers MAG, de Regt EB, Andries F, et al. Which chronic conditions are associated  
12 with better or poorer quality of life? *J Clin Epidemiol* 2000;**53**(9):895-907 doi:  
13 10.1016/s0895-4356(00)00204-3  
14  
15  
16  
17 21. Gotay CC, Holup JL, Pagano I. Ethnic differences in quality of life among early breast  
18 and prostate cancer survivors. *Psychooncology* 2002;**11**(2):103-13 doi:  
19 10.1002/pon.568  
20  
21  
22  
23 22. Halkett GK, Kristjanson LJ, Lobb E, et al. Information needs and preferences of women  
24 as they proceed through radiotherapy for breast cancer. *Patient Educ Couns*  
25 2012;**86**(3):396-404 doi: 10.1016/j.pec.2011.05.010  
26  
27  
28  
29  
30 23. Harrison J, Young J, Price M, et al. What are the unmet supportive care needs of people  
31 with cancer? A systematic review. *Support Care Cancer* 2009;**17**(8):1117-28 doi:  
32 10.1007/s00520-009-0615-5  
33  
34  
35  
36 24. Delaney G, Jacob S, Featherstone C, et al. The role of radiotherapy in cancer treatment.  
37 *Cancer* 2005;**104**(6):1129-37 doi: 10.1002/cncr.21324  
38  
39  
40  
41  
42 25. Zeguers M, de Haes HCJM, Zandbelt LC, et al. The information needs of new  
43 radiotherapy patients: how to measure? do they want to know everything? and if not,  
44 why? *Int J Radiat Oncol Biol Phys* 2012;**82**(1):418-24  
45  
46  
47  
48  
49 26. Douma KL, Koning CE, Zandbelt L, et al. Do patients' information needs decrease over  
50 the course of radiotherapy? *Support Care Cancer* 2012;**20**(9):2167-76 doi:  
51 10.1007/s00520-011-1328-0  
52  
53  
54  
55  
56  
57  
58  
59  
60

- 1  
2  
3 27. Siekkinen M, Laiho R, Ruotsalainen E, et al. Quality of care experienced by Finnish  
4  
5 cancer patients during radiotherapy. *Eur J Cancer Care (Engl)* 2008;**17**(4):387-93 doi:  
6  
7 10.1111/j.1365-2354.2007.00883.x  
8  
9  
10 28. Sandoval GA, Brown AD, Sullivan T, et al. Factors that influence cancer patients' overall  
11  
12 perceptions of the quality of care. *Int J Qual Health Care* 2006;**18**(4):266-74 doi:  
13  
14 10.1093/intqhc/mzl014  
15  
16 29. Larsson BW. Touch-screen versus paper-and-pen questionnaires: effects on patients'  
17  
18 evaluations of quality of care. *Int J Health Care Qual Assur Inc Leadersh Health Serv*  
19  
20 2006;**19**(4-5):328-38 doi: 10.1108/09526860610671382  
21  
22  
23 30. Newell S, Girgis A, Sanson-Fisher R, et al. Are touchscreen computer surveys acceptable  
24  
25 to medical oncology patients. *J Psychosoc Oncol* Published Online First: doi:  
26  
27 10.1300/J077v15n02\_03  
28  
29  
30 31. Zigmond A, Snaith R. The hospital anxiety and depression scale. *Acta Psychiatr Scand*  
31  
32 1983;**67**:361-70  
33  
34 32. Herrmann C. International experiences with the Hospital Anxiety and Depression Scale-A  
35  
36 review of validation data and clinical results. *J Psychosom Res* 1997;**42**(1):17-41 doi:  
37  
38 10.1016/s0022-3999(96)00216-4  
39  
40  
41 33. Moorey S, Greer S, Watson M, et al. The factor structure and factor stability of the  
42  
43 Hospital Anxiety and Depression Scale in Patients with Cancer. *Br J Psychiatry*  
44  
45 1991;**158**:225-59.  
46  
47 34. Boyes A, Newell S, Girgis A. Rapid assessment of psychosocial well-being: Are  
48  
49 computers the way forward in a clinical setting? *Qual Life Res* 2002;**11**(1):27-35 doi:  
50  
51 10.1023/A:1014407819645  
52  
53  
54  
55  
56  
57  
58  
59  
60

- 1  
2  
3 35. Australian Bureau of Statistics. SEIFA: Socio-economic indexes for areas. Secondary  
4  
5 SEIFA: Socio-economic indexes for areas 2008.  
6  
7 [http://www.abs.gov.au/websitedbs/D3310114.nsf/home/Seifa\\_entry\\_page](http://www.abs.gov.au/websitedbs/D3310114.nsf/home/Seifa_entry_page).  
8  
9  
10 36. O'Brien I, Britton E, Sarfati D, et al. The voice of experience: results from Cancer Control  
11  
12 New Zealand's first national cancer care survey. *N Z Med J* 2010;**123**(1325):10-9 doi:  
13  
14 10.1016/j.radonc.2011.08.005  
15  
16 37. Watson DE, Mooney D, Peterson S. Patient experiences with ambulatory cancer care in  
17  
18 British Columbia, 2005/06: UBC Centre for Health Services and Policy Research,  
19  
20 March 2007.  
21  
22  
23 38. Harmsen JAM, Bernsen RMD, Bruijnzeels MA, et al. Patients' evaluation of quality of  
24  
25 care in general practice: What are the cultural and linguistic barriers? *Patient Educ*  
26  
27 *Couns* 2008;**72**(1):155-62 doi: 10.1016/j.pec.2008.03.018  
28  
29  
30 39. Butow P, Sze M, Dugal-Beri P, et al. From inside the bubble: migrants' perceptions of  
31  
32 communication with the cancer team. *Support Care Cancer* 2011;**19**(2):281-90 doi:  
33  
34 10.1007/s00520-010-0817-x  
35  
36 40. Mitchison D, Butow P, Sze M, et al. Prognostic communication preferences of migrant  
37  
38 patients and their relatives. *Psychooncology* Published Online First: doi:  
39  
40 10.1002/pon.1923  
41  
42  
43 41. Jaipaul CK, Rosenthal GE. Are Older Patients More Satisfied With Hospital Care Than  
44  
45 Younger Patients? *J Gen Intern Med* 2003;**18**(1):23-30 doi: 10.1046/j.1525-  
46  
47 1497.2003.20114.x  
48  
49  
50 42. Schenker Y, Stewart A, Na B, et al. Depressive symptoms and perceived doctor-patient  
51  
52 communication in the Heart and Soul study. *J Gen Intern Med* 2009;**24**(5):550-6 doi:  
53  
54 10.1007/s11606-009-0937-5  
55  
56  
57  
58  
59  
60

- 1  
2  
3 43. Hall JA, Horgan TG, Stein TS, et al. Liking in the physician–patient relationship. *Patient*  
4  
5 *Educ Couns* 2002;**48**(1):69-77 doi: 10.1016/s0738-3991(02)00071-x  
6  
7 44. Hall JA, Roter DL, Milbrun MA, et al. Patients' Health as a Predictor of Physician and  
8  
9 Patient Behavior in Medical Visits: A Synthesis of Four Studies. *Med Care*  
10  
11 1996;**34**(12):1205-18.  
12  
13 45. Paul C, Carey M, Anderson A, et al. Cancer patients' concerns regarding access to cancer  
14  
15 care: perceived impact of waiting times along the diagnosis and treatment journey.  
16  
17 *Eur J Cancer Care (Engl)* Published Online First: 23 November 2011. doi:  
18  
19 10.1111/j.1365-2354.2011.01311.x  
20  
21  
22 46. Lehmann F, Hedges A, Hunt B. Barriers to rural patients electing to have radiotherapy.  
23  
24 Special report: Radiotherapy Summit 2000: Cancer Council Australia, November  
25  
26 2002.  
27  
28 47. Sales E. Family burden and quality of life. *Qual Life Res* 2003;**12**(Suppl 1):33-41 doi:  
29  
30 10.1023/a:1023513218433  
31  
32  
33 48. Clark PC, Dunbar SB. Family partnership intervention: a guide for a family approach to  
34  
35 care of patients with heart failure. *AACN Clin Issues* 2003;**14**(4):467-76  
36  
37  
38 49. Rijken M, Jones M, Heijmans M, et al. Supporting self-management. In: Nolte E, McKee  
39  
40 M, eds. *Caring for people with chronic conditions: a health system perspective*.  
41  
42 Berkshire: Open University Press, 2008:116-42.  
43  
44  
45 50. Shilling V, Jenkins V, Fallowfield L. Factors affecting patient and clinician satisfaction  
46  
47 with the clinical consultation: Can communication skills training for clinicians  
48  
49 improve satisfaction? *Psychooncology* 2003;**12**(6):599-611 doi: 10.1002/pon.731  
50  
51  
52 51. Lin H-R, Bauer-Wu SM. Psycho-spiritual well-being in patients with advanced cancer: an  
53  
54 integrative review of the literature. *J Adv Nurs* 2003;**44**(1):69-80 doi: 10.1046/j.1365-  
55  
56 2648.2003.02768.x  
57  
58  
59  
60

- 1  
2  
3 52. Halkett G, Merchant S, Jiwa M, et al. Effective communication and information provision  
4  
5 in radiotherapy—the role of radiation therapists. *J Radiother Pract* 2010;**9**(1):3-16  
6  
7 53. Halkett GK, Schofield P, O'Connor M, et al. Development and pilot testing of a radiation  
8  
9 therapist-led educational intervention for breast cancer patients prior to commencing  
10  
11 radiotherapy. *Asia Pac J Clin Oncol* 2012;**8**(3):e1-8 doi: 10.1111/j.1743-  
12  
13 7563.2012.01520.x  
14  
15 54. Nijman JL, Sixma H, Triest Bv, et al. The quality of radiation care: The results of focus  
16  
17 group interviews and concept mapping to explore the patient's perspective. *Radiother*  
18  
19 *Oncol* 2012;**102**(1):154-60 doi: 10.1016/j.radonc.2011.08.005  
20  
21 55. Manjer J, Merlo J, Berglund G. Validity of self-reported information on cancer:  
22  
23 Determinants of under- and over-reporting. *Eur J Epidemiol* 2004;**19**(3):239-47 doi:  
24  
25 10.1023/B:EJEP.0000020347.95126.11  
26  
27 56. Bergmann MM, Calle EE, Mervis CA, et al. Validity of self-reported cancers in a  
28  
29 prospective cohort study in comparison with data from state cancer registries. *Am J*  
30  
31 *Epidemiol* 1998;**147**(6):556-62  
32  
33  
34  
35  
36  
37  
38  
39  
40  
41  
42  
43  
44  
45  
46  
47  
48  
49  
50  
51  
52  
53  
54  
55  
56  
57  
58  
59  
60



1  
2  
3  
4  
5  
6  
7 **MANUSCRIPT TITLE:** Radiation oncology outpatient perceptions of patient-centred  
8 care: A cross-sectional survey

9  
10 **SHORT TITLE:** Patient-centred cancer care

11 **Author names, degrees and affiliations:**

12 L. J. Mackenzie *BPsych (Hons)*<sup>1</sup>

13 R. W. Sanson-Fisher *PhD*<sup>1</sup>

14 M. L. Carey *D.Psych*<sup>1</sup>

15 C. A. D'Este *PhD*<sup>2</sup>

16  
17 1. Priority Research Centre for Health Behaviour, School of Medicine and Public Health,  
18 Faculty of Health, University of Newcastle, Newcastle, Australia

19  
20 2. Centre for Clinical Epidemiology and Biostatistics, School of Medicine and Public  
21 Health, Faculty of Health, University of Newcastle, Newcastle, Australia

22  
23 **Address correspondence and reprints to:**

24 Ms Lisa Mackenzie

25 *Temporary Address (Until October 2012):*

26 *Breast Surgery,*

27 *Kyoto University Hospital*

28 *54 Kawahara-cho Shogoin*

29 *Sakyo-ku 606-8507*

30 *Kyoto, JAPAN*

31 *Ph: +81 8 04562 2832*

32  
33 *Permanent address:*

34 Health Behaviour Research Group

35 School of Medicine and Public Health

36 Faculty of Health, The University of Newcastle

37 HMRI Building, c/-University Drive,

38 Callaghan NSW 2308 Australia

39 T: +61 2 4913 8682

40 F: +61 2 4913 8779

41 E: [Lisa.Mackenzie@uon.edu.au](mailto:Lisa.Mackenzie@uon.edu.au)

42  
43 **Key words:**

44 Patient-Centered Care

45 Cross-Sectional Studies

46 Neoplasms

47 Radiation Oncology

48 Health Care Quality, Access, and Evaluation

49  
50 **Article type:** Research article

51  
52 **Word count (excluding title page, abstract, references, figures and tables):**

53 ~~3960~~304

54 **Text pages (including title page, tables, figure and references):** ~~38~~3

Formatted: Font: 12 pt, Not Bold

1  
2  
3  
4  
5  
6  
7  
8  
9  
10  
11  
12  
13  
14  
15  
16  
17  
18  
19  
20  
21  
22  
23  
24  
25  
26  
27  
28  
29  
30  
31  
32  
33  
34  
35  
36  
37  
38  
39  
40  
41  
42  
43  
44  
45  
46  
47  
48  
49  
50  
51  
52  
53  
54  
55  
56  
57  
58  
59  
60

Tables: 4  
Figures: 1  
References: [4456](#)

For peer review only

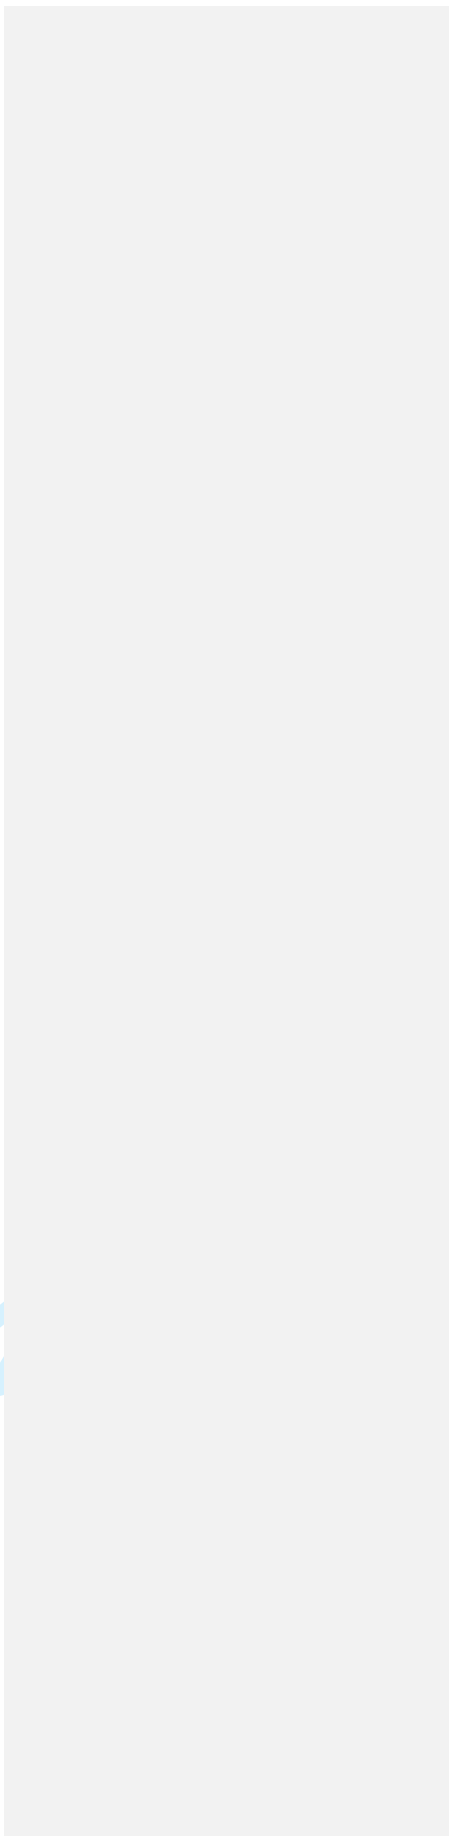

**ABSTRACT:**

**Objectives.** ~~The Institute of Medicine has indicated the urgency of evaluating and improving quality of health care, including patient-centred care.~~ We aimed to describe the proportion and characteristics of cancer patients who perceived that better care would have greatly improved their wellbeing in a) specific, and b) multiple domains of patient-centred care.

**Design.** Cross sectional touchscreen computer survey.

**Setting.** Four Australian radiation therapy departments located within major urban public hospitals.

**Participants.** Radiation therapy outpatients were invited to participate in a touchscreen computer survey. Eligible patients were aged at least 18 years old, diagnosed with cancer, and had sufficient English to complete the survey.

**Primary outcome measure.** Participants were asked whether their wellbeing could have been greatly improved if better care had been provided across eight domains of patient-centred care. Characteristics of those respondents who identified a) specific and b) multiple domains where it was perceived that better care would have greatly improved their well-being, were examined.

**Results.** Of 508 eligible radiation therapy patients, 344 (68%) completed the survey. Patients most frequently perceived that better care in the following domains could have improved their wellbeing: information and communication about their cancer (22%;

1  
2  
3  
4  
5  
6  
7 95% CI: 18-27%); emotional and spiritual support (22%; 95% CI: 18-27%);  
8  
9 management of physical symptoms (21%; 95% CI: 17-26%); and involvement of friends  
10  
11 and family (21%; 95% CI: 17-26%). Just under one third of respondents (31%; 95% CI:  
12  
13 26-36%) indicated that their wellbeing could have been improved by better care across  
14  
15 two or more domains of care. Patients in younger age groups and migrants to Australia  
16  
17 had higher odds of endorsing multiple domains where better care would have improved  
18  
19 their wellbeing.

20  
21  
22 **Conclusions.** ~~Patients in younger age groups and migrants to Australia had higher odds~~  
23  
24 ~~of identifying multiple domains of patient-centredness where better care would have~~  
25  
26 ~~greatly improved their wellbeing.~~ Further investigation of patients' perceptions  
27  
28 regarding how their perceived quality might be improved is warranted, particularly  
29  
30 amongst patients in younger age groups and migrants to Australia.  
31  
32  
33  
34  
35  
36  
37  
38  
39  
40  
41  
42  
43  
44  
45  
46  
47  
48  
49  
50  
51  
52  
53  
54  
55

## INTRODUCTION.

### Why assess patient views of quality of care?

The Institute of Medicine (IOM) [in the United States of America, an independent organisation for gathering evidence to assist health decision making](#), has indicated the urgency of assessing and improving the quality of health care [1]. Quality health care is care that is safe, timely, effective, efficient, equitable and patient-centred [2]. A patient-centred approach to care is defined as being respectful of, and responsive to, patients' physical, social and emotional preferences and needs [3]. Provision of patient-centred care may contribute to improvements in patients' physical, mental and social well-being [4 5]. A patient-centred approach to care is now endorsed as a key component of quality health care by many organisations (including the World Health Organisation [6]) and governments (e.g. in Australia, USA, UK, Canada, Germany, France, Netherlands and Switzerland [7]). [Although quality of care is often examined through audit and benchmarking of clinical outcomes data](#) [8]. Examining patients' judgements of how their experiences of care correspond with their preferences and needs is required in order to assess the quality of patient-centred care [9].

### What has previous patient-centred care research contributed to knowledge about prioritising quality improvement efforts?

~~Although previous research has indicated that up to 50% of cancer outpatients are dissatisfied with the level of information provided about physical symptom management, emotional support, involvement of family, and some aspects of access to care,[10-12] these studies have not provided an indication of the relative importance that patients place on quality improvement in these different domain areas. The patient satisfaction approach to assessing quality of care has been criticised for failing to~~

1  
2  
3  
4  
5  
6  
7  
8  
9  
10  
11  
12  
13  
14  
15  
16  
17  
18  
19  
20  
21  
22  
23  
24  
25  
26  
27  
28  
29  
30  
31  
32  
33  
34  
35  
36  
37  
38  
39  
40  
41  
42  
43  
44  
45  
46  
47  
48  
49  
50  
51  
52  
53  
54  
55  
56  
57  
58  
59  
60

consider differences in patient expectations, leading to emerging research comparing discrepancies between patients' perceived ideal and actual care [13]. However, this approach still does not capture patient perceptions of the degree to which their wellbeing would benefit from improved care across different domains [14]. Perceptions of relative benefit received by improvements in different domains of care may assist in prioritising quality improvement efforts.

Quality of patient-centred care has been assessed using a variety of patient reported outcomes measures including surveys of patient satisfaction and experiences which are closely linked to the IOM patient-centred care conceptual framework [10 12]. Patient satisfaction surveys' have been criticised because responses may be heavily dependent upon patients' expectations of care, leading to the development of patient experience surveys [12]. The Picker Institute survey assesses outpatients' experiences of care across the domains of patients' preferences; emotional support; physical comfort; information and education; coordination of care; access to care; and involvement of family/friends [11 12 15]. More recently, indicators of the quality of patient-centred care have been developed from international patient-centred oncology clinical practice guidelines [10 16]. These indicators have been grouped across the domains of information; coordination/organisation of care; physical support; emotional and psychological support; communication and respect; involvement; access; and follow-up/after-care. To date, these approaches have not attempted to capture patient perceptions of the degree to which their wellbeing would benefit from improved care across these different domains [14]. Drawing upon the formal supportive care needs assessment approach which aims to identify the level of patient need for help [17].  
identification of patients' views of the relative benefit that would be conferred by

1  
2  
3  
4  
5  
6  
7 improvements in different patient-centred domains care may assist with identifying and  
8 prioritising quality improvement efforts [10].

9  
10  
11  
12 ~~Previous work on patient-centred care has identified that s~~Some subgroups of patients  
13 may perceive that they receive poorer care than others. For instance, older patients may  
14 be more likely than younger patients to express satisfaction with care, possibly relating  
15 to differences in the expectations for care provision [18]. Additionally, cancer patients  
16 who have clinically significant levels of anxiety have been found to give lower ratings of  
17 satisfaction with care [19]. Wellbeing in patients diagnosed with chronic illness may be  
18 linked to aspects of social support such as having a partner, [20] and also potentially to  
19 ethnicity [21]. Given that there is some evidence of increased psychological distress and  
20 supportive care needs prior to and during treatment [22 23], it may also be that  
21 treatment stage may impact on perceptions of care.

### 22 23 24 25 26 27 28 29 30 31 32 33 **Patient-centred care for radiation therapy patients**

34  
35  
36 It is recommended that Aapproximately 50% of cancer patients undergo radiation  
37 therapy treatment [24]. Given that this treatment is often characterised by frequent  
38 contact with the healthcare system over the course of treatment, the radiation therapy  
39 setting provides an opportunity for addressing patient perceived needs across the  
40 multiple domains of patient-centred care [24]. Although research into specific domains  
41 and specific cancer types has been conducted in radiotherapy settings [22 25 26]T, to  
42 the best of our knowledge, this is the first study to ask cancer patients undergoing  
43 radiation therapy about their perceptions of how better care across multiple patient-  
44 centred domains could improve their wellbeing [27]. Further, no previous studies have

Formatted: Pattern: Clear (White)

1  
2  
3  
4  
5  
6 identified ~~whether~~ characteristics ~~within of~~ radiation therapy patients who are likely to  
7  
8 perceive better patient-centred care ~~than others~~ [28].  
9

10  
11  
12 This study aimed to examine the proportion and characteristics of radiation therapy  
13 patients who indicate that their well-being could have been greatly improved by better  
14 cancer care across each of eight domains of patient-centred care. We also aimed to  
15 assess characteristics associated with a patient perception that better care across  
16 multiple domains of patient-centred care would have improved their well-being.  
17  
18  
19  
20  
21  
22

## 23 24 **METHODS.**

### 25 26 **Ethics approvals**

27  
28 Ethics approval was obtained from the University of Newcastle and NSW Population &  
29 Health Services Research Ethics Committees.

Formatted: Font: Cambria

### 30 31 32 33 34 **Design**

35  
36 Cross sectional survey completed using touchscreen computers.  
37  
38  
39

### 40 41 **Participants**

42 Radiation oncology outpatients were recruited from four radiation therapy departments  
43 in a major urban centre in Australia between March and December 2010. Each radiation  
44 therapy department was attached to a major public teaching hospital, and had at least  
45 three Linear Accelerators available for treatment. Eligible patients were aged 18 years  
46 or older; diagnosed with cancer; and had sufficient command of English to complete the  
47 touchscreen computer survey. Patients who were receiving both radical and palliative  
48 treatment were eligible. Those Patients who were attending the clinic for the first time or  
49  
50  
51  
52  
53  
54



1  
2  
3  
4  
5  
6  
7 who were considered by clinic staff to be too unwell or unable to give informed consent  
8 were excluded.  
9

### 10 11 12 **Procedure**

13  
14 Patients waiting for a radiation therapy treatment were invited to participate in the  
15 study by a research assistant. Consenting patients were given a unique identification  
16 code to login to the touchscreen computer questionnaire. If patients were called into  
17 their treatment before finishing their survey, they had the option of resuming after their  
18 treatment. Touchscreen computer surveys have been reported as being faster and easier  
19 to use for outpatients than pencil and paper surveys,[29] and have been found to be  
20 acceptable to oncology patients [30].  
21  
22  
23  
24  
25  
26  
27  
28  
29

### 30 31 **Measures**

32 Digivey survey software (CREOSO - Digivey Survey Center, Phoenix, Arizona) was used  
33 to program the patient survey, which was administered using Dell Latitude XT2  
34 touchscreen laptop computers.  
35  
36  
37  
38  
39

40 Quality of Care: patient-centred care.

41  
42 Questions and domain descriptions were developed to correspond with domains of  
43 patient-centred care described in the literature,[10 12] ensuring face validity of the  
44 items and -clinical relevance to patients currently undergoing treatment. Survey items  
45  
46 were extensively pilot tested and modified based on feedback from 67 patients. Eight  
47 items, each assessing a different domain of care, were presented on separate screens  
48 with the stem “During my cancer care, my well-being would have been greatly improved  
49 by.” Table 1 lists the eight items and a short description of each domain that was  
50  
51  
52  
53  
54

1  
2  
3  
4  
5  
6  
7  
8  
9  
10  
11  
12  
13  
14  
15  
16  
17  
18  
19  
20  
21  
22  
23  
24  
25  
26  
27  
28  
29  
30  
31  
32  
33  
34  
35  
36  
37  
38  
39  
40  
41  
42  
43  
44  
45  
46  
47  
48  
49  
50  
51  
52  
53  
54  
55  
56  
57  
58  
59  
60

presented at the bottom of the touchscreen. Patients were asked to indicate their level of agreement with each statement on a 4-point Likert scale (Strongly disagree, Disagree, Agree, Strongly agree). Internal consistency of the items was assessed using Cronbach's alpha.

For peer review only



**Table 1. Survey items and descriptions (each assessing a different domain of care)**

| Item                                                                  | On screen description                                                                                                                                                       |
|-----------------------------------------------------------------------|-----------------------------------------------------------------------------------------------------------------------------------------------------------------------------|
| <b>Better management of my physical symptoms</b>                      | May relate to your pain, sleeplessness, other side-effects and symptoms.                                                                                                    |
| <b>Better information and communication about my cancer and care</b>  | May include: clear and consistent information about your diagnosis, test results, treatment, taking medications, food you should be eating, exercise you can do safely etc. |
| <b>Better emotional and/or spiritual support</b>                      | May include services or support to help you cope with: the impact of cancer on your life, doubts/worries, feelings of anxiety or sadness, changes to your body images etc.  |
| <b>Better services, information and support for my friends/family</b> | May include helping them to cope with the impact of your cancer, or providing opportunities for them to be involved in your care.                                           |
| <b>Better staff approachability and respect for me</b>                | Describes staff who are easy to contact and up-to-date with your medical history, and who give you opportunities to ask questions and be involved in treatment decisions.   |

1  
2  
3  
4  
5  
6  
7  
8  
9  
10  
11  
12  
13  
14  
15  
16  
17  
18  
19  
20  
21  
22  
23  
24  
25  
26  
27  
28  
29  
30  
31  
32  
33  
34  
35  
36  
37  
38  
39  
40  
41  
42  
43  
44  
45  
46  
47  
48  
49  
50  
51  
52  
53  
54  
55  
56  
57  
58  
59  
60

|                                                                         |                                                                                                                                                                                    |
|-------------------------------------------------------------------------|------------------------------------------------------------------------------------------------------------------------------------------------------------------------------------|
| <b>Getting better access to the care I need when required</b>           | Describes not having to wait too long to get appointments, and having treatment and medical advice available when needed.                                                          |
| <b>Better services/support to cope with changes to my relationships</b> | May include: knowing what changes to expect, and having some strategies to reduce the impact of cancer on your work, usual social activities, friendships or sexual relationships. |
| <b>Better services/advice to assist me with practical concerns</b>      | May include being able to access financial support, transport to treatment, home help services or other support needed to manage practical issues.                                 |

Demographic characteristics.

Patient self-report was used to collect age, gender, whether participants were born in Australia, living with a partner and the postcode of usual place of residence.

Disease characteristics.

A multiple choice question "What is your most recent primary cancer diagnosis?" was used to determine respondents' most recent primary cancer diagnosis. Common cancer types were listed on screen, along with the categories "other - please specify" and "don't know". Approximate time since diagnosis was calculated from patient self-reported year and month of diagnosis and their recruitment date. Patients were asked to indicate the number of radiation therapy treatment and outpatient appointments they had attended; whether they had experienced a second diagnosis and/or recurrence, and whether they

1  
2  
3  
4  
5  
6  
7 perceived that the aim of their treatment was to cure the cancer; prevent the cancer  
8 from coming back or control symptoms of cancer (cure is not possible).  
9

10  
11  
12 Psychological characteristics.

13  
14 The Hospital Anxiety and Depression Scale (HADS) is a 14-item self-report measure of  
15 anxiety and depression [31]. Both the anxiety and depression subscales provide scores  
16 of between 0 and 21 where 0-7= Normal; 8-10= Mild; 11-14 = Moderate; 15-21 = Severe.  
17  
18

19 The scale has been utilised in research and in clinical practice,[32] with demonstrated  
20 reliability and validity [33]. HADS scores have been found to be comparable when  
21 administered by touchscreen computer and pen-and-paper in a cancer patient  
22 population [34].  
23  
24  
25  
26  
27  
28  
29

### 30 **Statistical Methods**

31  
32 Radiation therapy patients were defined as having endorsed each domain if they  
33 indicated that they “agreed” ~~and-or~~ “strongly agreed” that better care would have greatly  
34 improved their well-being. The proportion of patients endorsing each domain was  
35 reported with 95% confidence intervals. Respondents were then dichotomised on the  
36 basis of: a) 0-1 domains endorsed or b) multiple (2 or more) domains endorsed.  
37  
38  
39

40 Univariate logistic analysis was used to investigate the relationship between  
41 demographic characteristics, disease factors and psychological distress and patient  
42 endorsement of a) each of the 8 domains of care and b) multiple (2 or more) domains of  
43 care requiring improvement. The explanatory variables examined included age (18-49,  
44 50-59, 60-69, 70 plus), sex (male, female), cancer diagnosis (Breast, Prostate,  
45 Other/Don't Know), second diagnosis and/or recurrence (no, yes), Australian born (no,  
46 yes), living with a partner (no, yes), anxiety (no, yes), depression (no, yes), usual place of  
47  
48  
49  
50  
51  
52  
53  
54

1  
2  
3  
4  
5  
6  
7  
8  
9  
10  
11  
12  
13  
14  
15  
16  
17  
18  
19  
20  
21  
22  
23  
24  
25  
26  
27  
28  
29  
30  
31  
32  
33  
34  
35  
36  
37  
38  
39  
40  
41  
42  
43  
44  
45  
46  
47  
48  
49  
50  
51  
52  
53  
54  
55  
56  
57  
58  
59  
60

residence (urban/rural, based on Accessibility/Remoteness Index of Australia (ARIA+) score) ~~and~~ socioeconomic status (Socio-Economic Indexes for Areas (SEIFA) average scores[35]), and number of radiotherapy treatment appointments attended (continuous measure). Variables with a *p* value of 0.2 or less on the univariate likelihood ratio test were included in the multiple logistic regression model. The backwards stepwise method was then used to remove all variables with a *p* value of 0.1 or more on the likelihood ratio test, with recruitment site included in all multiple regression models. The fit of the final model was assessed using the Hosmer-Lemeshow goodness of fit test. For individual domains, odds ratios with 95% confidence intervals are reported for multiple regression models. For the assessment of characteristics associated with endorsing multiple domains, odds ratios with 95% confidence intervals are reported for univariate and multiple regression models. Analysis was conducted using STATA version 11.2, and a significance level of 0.05 used.

### Sample size and statistical power

We aimed to recruit a total of 450 patients which, based on 50% of patients perceiving the need for better care in each domain, would allow us to obtain prevalence estimates with 95% CI's within  $\pm 5\%$  of the point estimate. This sample size would also be sufficient to detect differences of approximately ~~in~~ 15% in characteristics between those who perceive the need for better care in ~~each domain of care~~ each individual domain and also multiple domains of care with 80% power and 5% significance level.

### RESULTS.

Of the 639 patients screened for eligibility, 110 were ineligible due to: inadequate English (n=51); not currently receiving RT (n = 32); had already been approached about

1  
2  
3  
4  
5  
6  
7 the study ( $n = 6$ ); not being diagnosed with cancer ( $n = 3$ ); clinic staff concern about  
8 patient burden or ability to give informed consent ( $n = 3$ ); being aged under 18 ( $n = 2$ ),  
9 or no specified reason ( $n=13$ ). Of the 529 eligible patients, 85% ( $n = 451$ ) consented, and  
10 69% ( $n = 365$ ) completed the survey. Incomplete surveys were primarily because  
11 patients were called into their treatment appointment before survey completion, and no  
12 data was available from these surveys. An additional 21 patients were excluded because  
13 they reported that they were attending their first RT treatment. Once these participants  
14 were ruled ineligible, the overall response rate was 68% of 508 eligible radiation  
15 therapy patients. Table 2 shows the characteristics of the 344 respondents. 51% were  
16 male, the median age was 63.3 (Quartile [Q] 1: 52.2, Q3: 70.5) and the median number of  
17 weeks since diagnosis was 27.6 (Q1: 16.0, Q3: 57.3). The majority of respondents (97%)  
18 were currently receiving radiation therapy treatment, with the remainder reporting that  
19 they were attending the treatment centre for a check-up. The distribution of primary  
20 cancer type within the sample can be seen in Table 2.  
21  
22  
23  
24  
25  
26  
27  
28  
29  
30  
31  
32  
33  
34  
35  
36  
37  
38  
39  
40  
41  
42  
43  
44  
45  
46  
47  
48  
49  
50  
51  
52  
53  
54  
55  
56  
57  
58  
59  
60

Table 2. Demographic and disease characteristics of respondents (n = 344)

| Characteristic                                          | Mean (min, max) n (%)  |
|---------------------------------------------------------|------------------------|
| <b>Age (years)</b>                                      | 61.4 (18.9-91.4)       |
|                                                         | <b>n (%)</b>           |
| <b>Males</b>                                            | 176 (51%)              |
| <b>Region of birth</b>                                  |                        |
| Australia                                               | 231 (67%)              |
| UK/Ireland                                              | 30 (8.7%)              |
| Europe                                                  | 29 (8.4%)              |
| Asia                                                    | 25 (7.2%)              |
| Other                                                   | 29 (8.4%)              |
| <b>Perceived palliative treatment aim</b>               | 46 (14%)               |
| <b>Primary cancer type</b>                              |                        |
| Breast                                                  | 93 (27%)               |
| Prostate                                                | 73 (21%)               |
| Head and neck                                           | 33 (9.6%)              |
| Colorectal                                              | 20 (5.8%)              |
| Brain                                                   | 15 (4.4%)              |
| Lung                                                    | 15 (4.4%)              |
| Other                                                   | 89 (26%)               |
| Don't know                                              | 6 (1.7%)               |
| <b>Second diagnosis/recurrence</b>                      | 96 (28%)               |
|                                                         | <b>Median (Q1, Q3)</b> |
| <b>Completed appointments with <u>cancer</u> doctor</b> | 3 (2, 5)               |



|                                                 |                 |
|-------------------------------------------------|-----------------|
| <b>Completed radiation therapy appointments</b> | 9 (4, 17)       |
| <b>Weeks since diagnosis</b>                    | 27.6 (16, 37.3) |

*Note.* Observations within each variable may not add to the total due to missing values

### Internal consistency of items

When considering the items with responses on a 4-point Likert scale, the internal consistency (Cronbach's  $\alpha$ ) was 0.92. When the responses were dichotomised (agree versus disagree), Cronbach's  $\alpha$  was 0.89.

### Proportion of patients endorsing individual domains of patient-centred care

Table 3 shows the number and proportion of radiation oncology patients who agreed that their well-being could have been improved by better care across 8 different domains of patient-centred care. It can be seen that each domain was endorsed by between 12% and 22% of patients.

**Table 3. Proportion who reported that their wellbeing would have been improved by better care across 8 domains (n = 344)**

|                                                                | <b>Agree</b>          |
|----------------------------------------------------------------|-----------------------|
|                                                                | <b>n (%), 95% CI)</b> |
| <b>Information and communication about my cancer and care</b>  | 76 (22%, 18-27%)      |
| <b>Emotional and/or spiritual support</b>                      | 75 (22%, 18-27%)      |
| <b>Management of my physical symptoms</b>                      | 72 (21%, 17-26%)      |
| <b>Services; information and support for my friends/family</b> | 72 (21%, 17-26%)      |

1  
2  
3  
4  
5  
6  
7  
8  
9  
10  
11  
12  
13  
14  
15  
16  
17  
18  
19  
20  
21  
22  
23  
24  
25  
26  
27  
28  
29  
30  
31  
32  
33  
34  
35  
36  
37  
38  
39  
40  
41  
42  
43  
44  
45  
46  
47  
48  
49  
50  
51  
52  
53  
54  
55  
56  
57  
58  
59  
60

|                                                                  |                   |
|------------------------------------------------------------------|-------------------|
| <b>Services/advice to assist me with practical concerns</b>      | 69 (20%, 16-25%)  |
| <b>Access to the care I need when required</b>                   | 62 (18%, 14-23%)  |
| <b>Services/support to cope with changes to my relationships</b> | 56 (16%, 13-21%)  |
| <b>Staff approachability and respect for me</b>                  | 42 (12%, 8.9-16%) |

### Characteristics associated with endorsement of domains

Multiple logistic regression analysis identified that Australian born participants had lower odds of endorsing perceiving “better management of physical symptoms” would have greatly improved their well-being (OR = 0.4; 95% CI: 0.2-0.7;  $p = 0.0008$ ). No other characteristics were significantly associated with endorsing better management of physical symptoms.

Better information and communication about my cancer and care: Australian born patients had lower odds of perceiving that “better information and communication about my cancer and care” would have greatly improved their well-being (OR = 0.5; 95% CI: 0.3-0.9;  $p = 0.0153$ ), as did patients living with a partner (OR = 0.5; 95% CI: 0.3-0.8;  $p = 0.0083$ ). It was also found that patients aged 60-69 years (OR = 0.3; 95% CI: 0.1-0.7) and aged 70 or over (OR = 0.3; 95% CI: 0.2-0.8) had lower odds of endorsing this domain than younger participants ( $p = 0.0042$ ). Patients with a likely presence of depression had three times the odds of endorsing this domain (OR = 3.1; 95% CI: 1.1-9.0;  $p = 0.0396$ ).

1  
2  
3  
4  
5  
6  
7 Better emotional and/or spiritual support: Patients aged 60-69 years (OR = 0.3; 95% CI:  
8 0.1-0.6) and aged 70 or over (OR = 0.4; 95% CI: 0.2-0.8) had lower odds of endorsing  
9 this domain than younger participants ( $p = 0.0011$ ). Australian born patients had lower  
10 odds of endorsing this domain (OR = 0.3; 95% CI: 0.2-0.5;  $p < 0.0001$ ), whilst patients  
11 with clinically significant levels of depression had higher odds of endorsing (OR = 3.5;  
12 95% CI: 1.2-10.1;  $p = 0.0250$ ).  
13  
14  
15  
16  
17  
18  
19

20 Better services, information and support for my friends/family: Lower odds of  
21 endorsing this domain were found in older patients aged 60-69 years (OR = 0.2; 95% CI:  
22 0.1-0.5) and aged 70 or over (OR = 0.2; 95% CI: 0.1-0.4) compared to younger  
23 participants ( $p < 0.0001$ ), and also in Australian born patients (OR = 0.4; 95% CI: 0.2-0.6;  
24  $p = 0.0004$ ).  
25  
26  
27  
28  
29  
30  
31

32 Better staff approachability and respect for me: Australian born patients had  
33 significantly lower odds of endorsing this domain (OR = 0.3; 95% CI: 0.1-0.5;  $p =$   
34 0.0001). Marginally non-significantly lower odds of endorsing this domain were found in  
35 older patients aged 60-69 years (OR = 0.3; 95% CI: 0.1-0.9) compared to younger  
36 participants ( $p = 0.0683$ ).  
37  
38  
39  
40  
41  
42  
43

44 Getting better access to the care I need when required: Older patients aged 60-69 years  
45 (OR = 0.2; 95% CI: 0.1-0.5) and aged 70 or over (OR = 0.3; 95% CI: 0.1-0.8) had lower  
46 odds of endorsing this domain compared to younger participants ( $p = 0.0003$ ). Once  
47 again, Australian born patients had lower odds of endorsing this domain (OR = 0.3; 95%  
48 CI: 0.2-0.6;  $p = 0.0003$ ). Marginally non-significantly lower odds were also found in  
49  
50  
51  
52  
53  
54  
55

socioeconomic Group 2 (OR = 0.2; 95% CI: 0.1-0.9) and Group 3 (OR = 0.3; 95% CI: 0.1-0.9) compared to the lowest SES Group 1 ( $p = 0.0837$ ).

Better services/support to cope with changes to my relationships: Older patients aged 60-69 years (OR = 0.1; 95% CI: 0.1-0.4) and aged 70 or over (OR = 0.2; 95% CI: 0.1-0.4) had lower odds of endorsing this domain compared to younger participants ( $p < 0.0001$ ). Once again, Australian born patients had lower odds of endorsing this domain (OR = 0.3; 95% CI: 0.1-0.5;  $p = 0.0001$ ). Patients with clinically significant levels of depression had higher odds of endorsing this domain (OR = 7.2; 95% CI: 2.3-22.5;  $p = 0.0007$ ).

Better services/advice to assist me with practical concerns: Older patients aged 60-69 years (OR = 0.1; 95% CI: 0.1-0.3) and aged 70 or over (OR = 0.3; 95% CI: 0.1-0.6) had lower odds of endorsing this domain compared to younger participants ( $p < 0.0001$ ). Australian born patients also had lower odds of endorsing this domain (OR = 0.5; 95% CI: 0.3-0.8;  $p = 0.0070$ ).

### **Proportion of patients endorsing multiple domains where better care would have improved their well-being**

Figure 1 shows the percentage of respondents endorsing none, one and multiple domains where better care would have improved their wellbeing. Overall 31% of respondents ( $n = 107$ ) endorsed multiple domains where they agreed or strongly agreed that their wellbeing could have been improved by better care.

FIGURE 1 ABOUT HERE

For 55% of participants, it was perceived that improvement in well-being would not have resulted from better care in any of the examined domains. Fourteen percent of participants identified only one domain where better care would have greatly improved their well-being. Table 4 shows the results of analyses examining factors associated with the perception that wellbeing could have been improved by better care in multiple (2 or more) domains. It can be seen that compared with the younger age group (18-49 years), being aged 60 years or over was associated with significantly lower odds of endorsing multiple domains as requiring improvement. Additionally, relative to patients not born in Australia, those who were Australian born had significantly lower odds of endorsing multiple domains in which wellbeing would have been improved by better care. Outpatients living with a partner had significantly lower odds of identifying multiple domains where better care would have greatly improved their wellbeing. There were significantly higher odds of endorsing multiple domains amongst outpatients with a likely presence of anxiety.

**Table 4. Demographic, disease and HADS associations with endorsement of multiple domains as requiring improvement¶**

|                 | Multiple domains endorsed<br><i>n</i> (%) | LR Chi <sup>2</sup> , <i>p</i><br>Unadjusted<br>OR (95% CI) | LR Chi <sup>2</sup> , <i>p</i><br>Adjusted<br>OR (95% CI) |
|-----------------|-------------------------------------------|-------------------------------------------------------------|-----------------------------------------------------------|
| <b>Hospital</b> |                                           | <b>5.0, <i>p</i> = 0.1752</b>                               | <b>2.9, <i>p</i> = 0.4002</b>                             |
| Site 1          | 36 (36%)                                  | 1.0                                                         | 1.0                                                       |

|                                       |          |                           |                         |
|---------------------------------------|----------|---------------------------|-------------------------|
| Site 2                                | 22 (23%) | 0.5 (0.3-1.0)             | 0.6 (0.3-1.2)           |
| Site 3                                | 23 (32%) | 0.8 (0.4-1.6)             | 0.9 (0.4-1.8)           |
| Site 4                                | 26 (34%) | 0.9 (0.5-1.7)             | 1.0 (0.5-2.0)           |
| <b>Age category</b>                   |          | <b>35.9, p &lt;0.0001</b> | <b>28.9, p</b>          |
| 18-49 years                           | 36 (51%) | 1.0                       | <0.0001*                |
| 50-59 years                           | 34 (46%) | 0.8 (0.4-1.5)             | 1.0                     |
| 60-69 years                           | 20 (18%) | 0.2 (0.1-0.4)             | 0.7 (0.4-1.4)           |
| 70 years plus                         | 17 (19%) | 0.2 (0.1-0.4)             | 0.2 (0.1-0.4)           |
|                                       |          |                           | 0.2 (0.1-0.5)           |
| <b>Sex§</b>                           |          | <b>2.5, p = 0.1159</b>    |                         |
| Male                                  | 48 (27%) | 1.0                       |                         |
| Female                                | 59 (35%) | 1.4 (0.9-2.3)             |                         |
| <b>Cancer type§</b>                   |          | <b>3.8, p = 0.1469</b>    |                         |
| Breast                                | 31 (33%) | 1.0                       |                         |
| Prostate                              | 16 (22%) | 0.6 (0.3-1.1)             |                         |
| Other cancer types†                   | 60 (34%) | 1.0 (0.6-1.7)             |                         |
| <b>Second diagnosis or recurrence</b> |          | <b>1.0, p = 0.3123</b>    |                         |
| No                                    | 81 (33%) | 1.0                       |                         |
| Yes                                   | 26 (27%) | 0.8 (0.5-1.3)             |                         |
| <b>Born in Australia</b>              |          | <b>8.5, p = 0.0037</b>    | <b>5.4, p = 0.0205*</b> |
| No                                    | 47 (42%) | 1.0                       | 1.0                     |
| Yes                                   | 60 (26%) | 0.5 (0.3-0.8)             | 0.5 (0.3-0.9)           |
| <b>Socioeconomic status</b>           |          | <b>0.3, p = 0.5758</b>    |                         |
| Low                                   | 5 (22%)  | 1.0                       |                         |

|                                                 |          |                         |                         |
|-------------------------------------------------|----------|-------------------------|-------------------------|
| Medium                                          | 8 (16%)  | 0.7 (0.2-2.4)           |                         |
| High                                            | 59 (22%) | 1.0 (0.4-2.9)           |                         |
| <b>Usual place of residence</b>                 |          | <b>0.3, p = 0.5758</b>  |                         |
| Major city                                      | 87 (32%) | 1.0                     |                         |
| Regional or rural                               | 19 (28%) | 0.8 (0.5-1.5)           |                         |
| <b>Living with partner</b>                      |          | <b>5.2, p = 0.0224</b>  | <b>3.9, p = 0.0481*</b> |
| No                                              | 50 (38%) | 1.0                     | 1.0                     |
| Yes                                             | 57 (27%) | 0.6 (0.4-0.9)           | 0.6 (0.4-1.0)           |
| <b>Clinically significant anxiety‡</b>          |          | <b>10.4, p = 0.0013</b> | <b>4.3, p = 0.0383*</b> |
| No                                              | 82 (28%) | 1.0                     | 1.0                     |
| Yes                                             | 25 (52%) | 2.8 (1.5-5.2)           | 2.1 (1.0-4.1)           |
| <b>Clinically significant depression‡§</b>      |          | <b>5.7, p = 0.0167</b>  |                         |
| No                                              | 97 (30%) | 1                       |                         |
| Yes                                             | 10 (59%) | 3.3 (1.2-9.0)           |                         |
| <b>Completed radiation therapy appointments</b> |          | <b>0.02, p = 0.8893</b> |                         |

Note. Observations within each variable may not add to the total due to missing values

†Including brain, colorectal, head and neck, lung, non-Hodgkin's lymphoma, and other cancer types

‡Assessed using the Hospital Anxiety and Depression Scale (HADS)

§Eliminated during backwards stepwise multiple logistic regression analysis

|| Reported *p*-values are from the Likelihood ratio test

¶ *p*-values for the Hosmer-Lemeshow goodness of fit test were between 0.2 and 0.9 for specific domain models; and was 0.1 for the multiple domain model

## DISCUSSION

### In which domains would better care greatly improve wellbeing for the most patients?

For each of the eight domains of care assessed, between 12-22% of respondents agreed or strongly agreed that their wellbeing would have greatly improved with better care.

One fifth or more agreed that improvements to the following domains would have improved their care: better information and communication about my cancer and care (22%); better emotional and/or spiritual support (22%); better management of physical symptoms (21%); better services information and support for friends/family (21%); and better services/advice to assist with practical concerns (20%). Overall, these frequencies were lower than identified in comparable domains in recent international studies of cancer patient experiences of care in Australia, New Zealand, British Columbia, Canada and Europe [10 11 19 36 37]. This discrepancy may be a consequence of the differences in measures. Although past measures have assessed experiences of care or unmet need, they have not assessed the impact that patients perceive better care in these patient-centred domains would have on their wellbeing. Alternatively, the discrepancies between findings may be a result of improved delivery of patient centred care over time.

### Characteristics associated with endorsing each domain of patient-centred care

#### Country of birth

Australian born patients had lower odds of endorsing each of the assessed domains of patient-centred care. It may be that Australian born patients perceive that they are receiving better care than migrants. Alternatively, it may be that Australian born



1  
2  
3  
4  
5  
6  
7 patients have lower expectations of care and of the degree to which their well-being  
8 would be improved by better care [38]. Linguistic and cultural barriers to patient  
9 perceptions of high quality health care have been previously identified, highlighting the  
10 need for responsiveness to cultural background for optimal health care delivery [38].

11  
12  
13  
14 ~~There is a need to investigate this finding amongst more culturally and linguistically~~  
15 ~~diverse cancer communities~~ Although, given that the current research was limited to  
16 patients with adequate English to complete the survey, there has been increased  
17 research attention on some of these challenges faced by people with cancer from  
18 culturally and linguistically diverse backgrounds in Australia [39 40].  
19  
20  
21  
22  
23  
24

#### 25 26 Age group

27  
28 Older age was associated with lower odds of endorsing a need for improvement in all  
29 domains of patient-centred care, with the exception of management of physical  
30 symptoms and staff approachability and respect for the patient. This is consistent with  
31 previous studies suggesting that older age is associated with higher overall patient  
32 satisfaction ratings [41] and that older patients undergoing radiation treatment have  
33 lower information needs [25]. It may be that older patients perceive pain management  
34 and interpersonal care as a traditional role of the doctor, leading to similar perceptions  
35 about the need for improvement in these domains as held by younger age groups.  
36  
37  
38  
39  
40  
41  
42  
43  
44

#### 45 HADS classified depression

46  
47 Patients with HADS classified depression had higher odds of endorsing the following  
48 three domains than non-depressed respondents: Information and communication about  
49 cancer and care; emotional and spiritual support; and support with changes to  
50 relationships. A diagnosis of chronic disease with comorbid depression has previously  
51  
52  
53  
54

1  
2  
3  
4  
5  
6  
7 been associated with perceptions of poor doctor-patient communication [42]. This may  
8 be because depressive symptoms such as negative affect may make interactions with  
9 health care providers more strained and less effective than for non-depressed patients  
10 [43 44]. Alternatively it may be that there are patient recall difficulties arising from  
11 depressive symptoms such as poor concentration, leading to negative patient  
12 perceptions of information provision and communication [42].  
13  
14  
15  
16  
17  
18  
19

#### 20 Socioeconomic status

21  
22 Higher socioeconomic groups were found to have marginally significantly lower odds of  
23 endorsing issues relating to getting access to care when required. Patients from higher  
24 SES areas may be more likely to live in wealthier urban areas that are closer to health  
25 care facilities, and therefore have less difficulties with access [45]. Given Australia's  
26 dispersed population, access to cancer care service delivery can be challenging for  
27 patients from lower SES areas, particularly those in rural and regional areas. This is  
28 particularly the case for accessing radiation therapy treatment, which is only available in  
29 metropolitan centres and very few major regional centres [46].  
30  
31  
32  
33  
34  
35  
36  
37  
38  
39

#### 40 **Multiple domains of patient-centred care: Characteristics of particularly** 41 **vulnerable groups**

42  
43 Overall, 31% of patients indicated that better care in multiple domains of patient-  
44 centred care would have greatly improved their well-being. Older patients had lower  
45 odds of reporting that improvements in their care were needed multiple domains of  
46 care. This finding has been frequently reported in patient satisfaction research [41]. It  
47 has been suggested that this may reflect differences in the expectations or preferences of  
48 care of older people compared to younger people [18]. Consistent with the findings  
49  
50  
51  
52  
53  
54  
55

1  
2  
3  
4  
5  
6  
7 across the individual domains of care, patients born in Australia had lower odds of  
8 endorsing multiple domains where better care would have greatly improved their  
9 wellbeing. This is consistent with findings of lower patient satisfaction has been  
10 reported in migrant groups in international settings [38].  
11  
12  
13

14  
15  
16 A significant trend towards lower odds of reporting improvements in their care were  
17 needed was seen in those respondents living with a partner. Spranger et al [20] reported  
18 that quality of life in individuals with chronic disease was higher amongst those with a  
19 partner. Family members and carers may play an important role in assisting patients to  
20 navigate the health care system and may advocate on the patient's behalf [47]. Patients'  
21 self-management skills may also be complemented by having a support person,[48]  
22 however these findings warrant further exploration in cancer settings [49].  
23  
24  
25  
26  
27  
28  
29  
30  
31

32 As expected, an association was found between clinically significant anxiety levels and  
33 patients' perceptions that their well-being could be improved by better care across  
34 multiple patient-centred domains. This is consistent with findings suggesting that  
35 individuals suffering from elevated levels of anxiety may be more likely to be critical of  
36 the health care system [50]. Alternatively, anxiety may affect interactions with health  
37 care providers and the effectiveness of help seeking behaviours, resulting in the receipt  
38 of poorer care across multiple domains. This finding suggests that there is a need to  
39 identify these patients in clinical practice and reduce their perceived room for  
40 improvement in wellbeing by alleviating their anxiety and improving their perceptions  
41 of care [51]. There have been some partially successful intervention studies conducted  
42 in radiotherapy settings [52 53] and more generally [3] that have aimed to improve  
43 patient-centredness of care.  
44  
45  
46  
47  
48  
49  
50  
51  
52  
53  
54  
55

## Strengths and Limitations

The current study achieved a high consent rate compared to recent research examining cancer outpatient satisfaction with care,[11] and to the best of our knowledge, is also the first large study to assess patient-centred care in radiation therapy outpatients [54].

Heterogeneous cancer sites and stages were included to provide clinics with information about which patient groups may be missing out on elements of patient-centred care. The quality of care measure was developed following extensive pilot testing and with reference to the literature, and the domains have been supported by a recent qualitative study with radiation oncology patients [54]. Therefore, it appears to have face validity as well as internal reliability. However, further examination of its psychometric properties is needed. Demographic information was collected via patient self-report. Accuracy of this method has been questioned,[55] however has been shown to produce reliable responses for these demographic variables,[56] and is a cost effective and feasible way of collecting these data.

It should also be noted that due to extended pilot testing and low survey completion rates, our final sample size was smaller than planned. However, given that the proportion of patients perceiving the need for better care in each domain was lower than expected, we were still able to obtain prevalence estimates with 95% CI's within ±5% of the point estimate, and detect differences of approximately 15% in characteristics between those who did and did not perceive the need for better care in each domain of care with 80% power and 5% significance level.

**Conclusions**

Thirty-one percent of respondents identified that better care across multiple domains would have greatly improved their well-being. “Information and education”, “emotional and spiritual support”, “management of physical symptoms” and “involvement of friends and family” were the 4 domains most commonly identified where better care would have increased respondent well-being. Older patients and patients born in Australia had significantly lower odds of identifying multiple domains of patient-centred care where better care would have improved their well-being. This suggests that younger patients and migrants to Australia appear to be more likely to identify that better care would be of benefit to their wellbeing. Further investigation of how these factors interact with wellbeing and the provision of patient-centred care may assist in developing targeted interventions to improve outcomes for these groups.

**ACKNOWLEDGEMENTS:**

We would like to thank Sundresan Naicker, Jay Roberts, Kelauren Barry and Ryan Courtney for their assistance with data collection for this study. We would also like to thank Dr Patrick McElduff, Mr Daniel Barker and Mr Michael Fitzgerald for their guidance with statistical analysis. We would also like to thank the staff and patients at the participating radiation oncology treatment centres.

**COMPETING INTERESTS:**

There are no disclosures from any authors.

**FUNDING STATEMENT:**

1  
2  
3  
4  
5  
6  
7 This research received no specific grant from any funding agency in the public,  
8 commercial or not-for-profit sectors. Lisa Mackenzie's PhD candidature is supported by  
9 The University of Newcastle School of Medicine and Public Health Professor Jill  
10 Cockburn Scholarship in Health Behaviour. Dr. Mariko Carey is supported by a Hunter  
11 Medical Research Institute (HMRI) Fellowship. The touchscreen computer resources and  
12 patient recruitment costs were covered by a 2009 University of Newcastle Priority  
13 Research Centre for Health Behaviour research grant.  
14  
15  
16  
17  
18  
19  
20  
21  
22  
23  
24  
25  
26  
27  
28  
29  
30  
31  
32  
33  
34  
35  
36  
37  
38  
39  
40  
41  
42  
43  
44  
45  
46  
47  
48  
49  
50  
51  
52  
53  
54  
55  
56  
57  
58  
59  
60

1  
2  
3  
4  
5  
6  
7 **REFERENCE LIST.**

- 8  
9 1. Chassin MR, Galvin RW, and the National Roundtable on Health Care Quality. The Urgent  
10 Need to Improve Health Care Quality. *JAMA* 1998;**280**(11):1000-05 doi:  
11 10.1001/jama.280.11.1000  
12  
13  
14 2. Institute of Medicine. *Crossing The Quality Chasm: A New Health System for the 21<sup>st</sup>*  
15 *Century*. Washington DC: National Academy Press, 2001.  
16  
17  
18 3. Lewin S, Skea Z, Entwistle VA, et al. Interventions for providers to promote a patient-  
19 centred approach in clinical consultations. *Cochrane Database Syst Rev* 2001(4):Art.  
20 No.: CD003267. doi: 10.1002/14651858.CD003267  
21  
22  
23  
24 4. Kinmonth AL, Woodcock A, Griffin S, et al. Randomised controlled trial of patient centred  
25 care of diabetes in general practice: impact on current wellbeing and future disease  
26 risk. The Diabetes Care From Diagnosis Research Team. *BMJ* 1998;**317**(7167):1202-8  
27 doi: 10.1136/bmj.317.7167.1202  
28  
29  
30  
31 5. Epstein RM, Fiscella K, Lesser CS, et al. Why the nation needs a policy push on patient-  
32 centered health care. *Health Aff (Millwood)* 2010;**29**(8):1489-95 doi:  
33 10.1377/hlthaff.2009.0888  
34  
35  
36  
37 6. Arah OA, Westert GP, Hurst J, et al. A conceptual framework for the OECD Health Care  
38 Quality Indicators Project. *Int J Qual Health Care* 2006;**18**(Suppl 1):5-13 doi:  
39 10.1093/intqhc/mzl024  
40  
41  
42  
43 7. Groene O, Skau JKH, Frølich A. An international review of projects on hospital  
44 performance assessment. *Int J Qual Health Care* 2008;**20**(3):162-71 doi:  
45 10.1093/intqhc/mzn008  
46  
47  
48  
49 8. Eden J, Simone JV, editors. *Assessing the quality of cancer care: an approach to*  
50 *measurement in Georgia*. Washington, D.C.: National Academy of Sciences, 2005.  
51  
52  
53  
54  
55

- 1  
2  
3  
4  
5  
6  
7 9. Stewart M. Towards a global definition of patient centred care. *BMJ* 2001;**322**(7284):444-  
8 45 doi: 10.1136/bmj.322.7284.444  
9
- 10 10. Ouwens M, Hermens R, Hulscher M, et al. Development of indicators for patient-centred  
11 cancer care. *Support Care Cancer* 2010;**18**(1):121-30 doi: 10.1007/s00520-009-0638-  
12 y  
13
- 14 11. Cancer Institute NSW. New South Wales Cancer Patient Satisfaction Survey 2008.  
15 Sydney: Cancer Institute NSW, July 2009.  
16
- 17 12. Jenkinson C, Coulter A, Bruster S, et al. Patients' experiences and satisfaction with health  
18 care: results of a questionnaire study of specific aspects of care. *Qual Saf Health Care*  
19 2002;**11**(4):335-39 doi: 10.1136/qhc.11.4.335  
20
- 21 13. Goldzweig G, Meirowitz A, Hubert A, et al. Meeting expectations of patients with cancer:  
22 relationship between patient Satisfaction, depression, and coping. *J Clin Oncol*  
23 2010;**28**(9):1560-65 doi: 10.1200/jco.2009.25.4987  
24
- 25 14. Carr AJ, Gibson B, Robinson PG. Is quality of life determined by expectations or  
26 experience? *BMJ* 2001;**322**(7296):1240-43 doi: 10.1136/bmj.322.7296.1240  
27
- 28 15. Gerteis M, Edgman-Levitan S, Daley J. *Through the Patients' Eyes. Understanding and*  
29 *Promoting Patient-Centred Care* San Francisco, CA: Jossey-Bass, 1993.  
30
- 31 16. Uphoff EPMM, Wennekes L, Punt CJA, et al. Development of generic quality indicators  
32 for patient-centered cancer care by using a RAND modified delphi method. **Publish**  
33 **Ahead of Print**:10.1097/NCC.0b013e318210e3a2  
34
- 35 17. Bonevski B, Sanson-Fisher R, Girgis A, et al. Evaluation of an instrument to assess the  
36 needs of patients with cancer. 2000;**88**(1):217-25  
37
- 38 18. Wan GJ, Counte MA, Cella DF, et al. An analysis of the impact of demographic, clinical,  
39 and social factors on health-related quality of life. *Value Health* 1999;**2**(4):308-18 doi:  
40 10.1046/j.1524-4733.1999.24006.x  
41  
42  
43  
44  
45  
46  
47  
48  
49  
50  
51  
52  
53  
54  
55  
56  
57  
58  
59  
60



- 1  
2  
3  
4  
5  
6  
7 19. Von Essen L, Larsson G, ÖBerg K, et al. 'Satisfaction with care': associations with  
8 health-related quality of life and psychosocial function among Swedish patients with  
9 endocrine gastrointestinal tumours. *Eur J Cancer Care* 2002;**11**(2):91-99 doi:  
10 10.1046/j.1365-2354.2002.00293.x  
11  
12  
13  
14 20. Sprangers MAG, de Regt EB, Andries F, et al. Which chronic conditions are associated  
15 with better or poorer quality of life? *J Clin Epidemiol* 2000;**53**(9):895-907 doi:  
16 10.1016/s0895-4356(00)00204-3  
17  
18  
19  
20 21. Gotay CC, Holup JL, Pagano I. Ethnic differences in quality of life among early breast  
21 and prostate cancer survivors. *Psychooncology* 2002;**11**(2):103-13 doi:  
22 10.1002/pon.568  
23  
24  
25  
26 22. Halkett GK, Kristjanson LJ, Lobb E, et al. Information needs and preferences of women  
27 as they proceed through radiotherapy for breast cancer. *Patient Educ Couns*  
28 2012;**86**(3):396-404 doi: 10.1016/j.pec.2011.05.010  
29  
30  
31  
32 23. Harrison J, Young J, Price M, et al. What are the unmet supportive care needs of people  
33 with cancer? A systematic review. *Support Care Cancer* 2009;**17**(8):1117-28 doi:  
34 10.1007/s00520-009-0615-5  
35  
36  
37  
38 24. Delaney G, Jacob S, Featherstone C, et al. The role of radiotherapy in cancer treatment.  
39 *Cancer* 2005;**104**(6):1129-37 doi: 10.1002/cncr.21324  
40  
41  
42 25. Zeguers M, de Haes HCJM, Zandbelt LC, et al. The information needs of new  
43 radiotherapy patients: how to measure? do they want to know everything? and if not,  
44 why? *Int J Radiat Oncol Biol Phys* 2012;**82**(1):418-24  
45  
46  
47 26. Douma KL, Koning CE, Zandbelt L, et al. Do patients' information needs decrease over  
48 the course of radiotherapy? *Support Care Cancer* 2012;**20**(9):2167-76 doi:  
49 10.1007/s00520-011-1328-0  
50  
51  
52  
53  
54  
55  
56  
57  
58  
59  
60

- 1  
2  
3  
4  
5  
6  
7 27. Siekkinen M, Laiho R, Ruotsalainen E, et al. Quality of care experienced by Finnish  
8 cancer patients during radiotherapy. *Eur J Cancer Care (Engl)* 2008;**17**(4):387-93 doi:  
9 10.1111/j.1365-2354.2007.00883.x  
10  
11  
12 28. Sandoval GA, Brown AD, Sullivan T, et al. Factors that influence cancer patients' overall  
13 perceptions of the quality of care. *Int J Qual Health Care* 2006;**18**(4):266-74 doi:  
14 10.1093/intqhc/mzl014  
15  
16 29. Larsson BW. Touch-screen versus paper-and-pen questionnaires: effects on patients'  
17 evaluations of quality of care. *Int J Health Care Qual Assur Inc Leadersh Health Serv*  
18 2006;**19**(4-5):328-38 doi: 10.1108/09526860610671382  
19  
20 30. Newell S, Girgis A, Sanson-Fisher R, et al. Are touchscreen computer surveys acceptable  
21 to medical oncology patients. *J Psychosoc Oncol* Published Online First: doi:  
22 10.1300/J077v15n02\_03  
23  
24 31. Zigmond A, Snaith R. The hospital anxiety and depression scale. *Acta Psychiatr Scand*  
25 1983;**67**:361-70  
26  
27 32. Herrmann C. International experiences with the Hospital Anxiety and Depression Scale-A  
28 review of validation data and clinical results. *J Psychosom Res* 1997;**42**(1):17-41 doi:  
29 10.1016/s0022-3999(96)00216-4  
30  
31 33. Moorey S, Greer S, Watson M, et al. The factor structure and factor stability of the  
32 Hospital Anxiety and Depression Scale in Patients with Cancer. *Br J Psychiatry*  
33 1991;**158**:225-59.  
34  
35 34. Boyes A, Newell S, Girgis A. Rapid assessment of psychosocial well-being: Are  
36 computers the way forward in a clinical setting? *Qual Life Res* 2002;**11**(1):27-35 doi:  
37 10.1023/A:1014407819645  
38  
39  
40  
41  
42  
43  
44  
45  
46  
47  
48  
49  
50  
51  
52  
53  
54  
55  
56  
57  
58  
59  
60

- 1  
2  
3  
4  
5  
6  
7 35. Australian Bureau of Statistics. SEIFA: Socio-economic indexes for areas. Secondary  
8 SEIFA: Socio-economic indexes for areas 2008.  
9  
10 [http://www.abs.gov.au/websitedbs/D3310114.nsf/home/Seifa\\_entry\\_page](http://www.abs.gov.au/websitedbs/D3310114.nsf/home/Seifa_entry_page).  
11  
12 36. O'Brien I, Britton E, Sarfati D, et al. The voice of experience: results from Cancer Control  
13 New Zealand's first national cancer care survey. *N Z Med J* 2010;**123**(1325):10-9 doi:  
14 10.1016/j.radonc.2011.08.005  
15  
16 37. Watson DE, Mooney D, Peterson S. Patient experiences with ambulatory cancer care in  
17 British Columbia, 2005/06: UBC Centre for Health Services and Policy Research,  
18 March 2007.  
19  
20 38. Harmsen JAM, Bernsen RMD, Bruijnzeels MA, et al. Patients' evaluation of quality of  
21 care in general practice: What are the cultural and linguistic barriers? *Patient Educ*  
22 *Couns* 2008;**72**(1):155-62 doi: 10.1016/j.pec.2008.03.018  
23  
24 39. Butow P, Sze M, Dugal-Beri P, et al. From inside the bubble: migrants' perceptions of  
25 communication with the cancer team. *Support Care Cancer* 2011;**19**(2):281-90 doi:  
26 10.1007/s00520-010-0817-x  
27  
28 40. Mitchison D, Butow P, Sze M, et al. Prognostic communication preferences of migrant  
29 patients and their relatives. *Psychooncology* Published Online First: doi:  
30 10.1002/pon.1923  
31  
32 41. Jaipaul CK, Rosenthal GE. Are Older Patients More Satisfied With Hospital Care Than  
33 Younger Patients? *J Gen Intern Med* 2003;**18**(1):23-30 doi: 10.1046/j.1525-  
34 1497.2003.20114.x  
35  
36 42. Schenker Y, Stewart A, Na B, et al. Depressive symptoms and perceived doctor-patient  
37 communication in the Heart and Soul study. *J Gen Intern Med* 2009;**24**(5):550-6 doi:  
38 10.1007/s11606-009-0937-5  
39  
40  
41  
42  
43  
44  
45  
46  
47  
48  
49  
50  
51  
52  
53  
54  
55  
56  
57  
58  
59  
60

- 1  
2  
3  
4  
5  
6  
7 43. Hall JA, Horgan TG, Stein TS, et al. Liking in the physician–patient relationship. *Patient*  
8 *Educ Couns* 2002;**48**(1):69-77 doi: 10.1016/s0738-3991(02)00071-x  
9
- 10 44. Hall JA, Roter DL, Milbrun MA, et al. Patients' Health as a Predictor of Physician and  
11 Patient Behavior in Medical Visits: A Synthesis of Four Studies. *Med Care*  
12 1996;**34**(12):1205-18.  
13
- 14 45. Paul C, Carey M, Anderson A, et al. Cancer patients' concerns regarding access to cancer  
15 care: perceived impact of waiting times along the diagnosis and treatment journey.  
16 *Eur J Cancer Care (Engl)* Published Online First: 23 November 2011. doi:  
17 10.1111/j.1365-2354.2011.01311.x  
18
- 19 46. Lehmann F, Hedges A, Hunt B. Barriers to rural patients electing to have radiotherapy.  
20 Special report: Radiotherapy Summit 2000: Cancer Council Australia, November  
21 2002.  
22
- 23 47. Sales E. Family burden and quality of life. *Qual Life Res* 2003;**12**(Suppl 1):33-41 doi:  
24 10.1023/a:1023513218433  
25
- 26 48. Clark PC, Dunbar SB. Family partnership intervention: a guide for a family approach to  
27 care of patients with heart failure. *AACN Clin Issues* 2003;**14**(4):467-76  
28
- 29 49. Rijken M, Jones M, Heijmans M, et al. Supporting self-management. In: Nolte E, McKee  
30 M, eds. Caring for people with chronic conditions: a health system perspective.  
31 Berkshire: Open University Press, 2008:116-42.  
32
- 33 50. Shilling V, Jenkins V, Fallowfield L. Factors affecting patient and clinician satisfaction  
34 with the clinical consultation: Can communication skills training for clinicians  
35 improve satisfaction? *Psychooncology* 2003;**12**(6):599-611 doi: 10.1002/pon.731  
36
- 37 51. Lin H-R, Bauer-Wu SM. Psycho-spiritual well-being in patients with advanced cancer: an  
38 integrative review of the literature. *J Adv Nurs* 2003;**44**(1):69-80 doi: 10.1046/j.1365-  
39 2648.2003.02768.x  
40  
41  
42  
43  
44  
45  
46  
47  
48  
49  
50  
51  
52  
53  
54  
55  
56  
57  
58  
59  
60

- 1  
2  
3  
4  
5  
6  
7 52. Halkett G, Merchant S, Jiwa M, et al. Effective communication and information provision  
8 in radiotherapy—the role of radiation therapists. *J Radiother Pract* 2010;**9**(1):3-16  
9  
10 53. Halkett GK, Schofield P, O'Connor M, et al. Development and pilot testing of a radiation  
11 therapist-led educational intervention for breast cancer patients prior to commencing  
12 radiotherapy. *Asia Pac J Clin Oncol* 2012;**8**(3):e1-8 doi: 10.1111/j.1743-  
13 7563.2012.01520.x  
14  
15  
16  
17 54. Nijman JL, Sixma H, Triest BV, et al. The quality of radiation care: The results of focus  
18 group interviews and concept mapping to explore the patient's perspective. *Radiother*  
19 *Oncol* 2012;**102**(1):154-60 doi: 10.1016/j.radonc.2011.08.005  
20  
21  
22  
23 55. Manjer J, Merlo J, Berglund G. Validity of self-reported information on cancer:  
24 Determinants of under- and over-reporting. *Eur J Epidemiol* 2004;**19**(3):239-47 doi:  
25 10.1023/B:EJEP.0000020347.95126.11  
26  
27  
28  
29 56. Bergmann MM, Calle EE, Mervis CA, et al. Validity of self-reported cancers in a  
30 prospective cohort study in comparison with data from state cancer registries. *Am J*  
31 *Epidemiol* 1998;**147**(6):556-62  
32  
33  
34  
35  
36  
37  
38  
39  
40  
41  
42  
43  
44  
45  
46  
47  
48  
49  
50  
51  
52  
53  
54  
55  
56  
57  
58  
59  
60

1  
2  
3  
4  
5  
6  
7  
8  
9  
10  
11  
12  
13  
14  
15  
16  
17  
18  
19  
20  
21  
22  
23  
24  
25  
26  
27  
28  
29  
30  
31  
32  
33  
34  
35  
36  
37  
38  
39  
40  
41  
42  
43  
44  
45  
46  
47  
48  
49  
50  
51  
52  
53  
54  
55  
56  
57  
58  
59  
60



Figure 1. Percentage of respondents endorsing 0-8 domains in which better care would have greatly improved their well-being

Review only

STROBE Statement—Checklist of items that should be included in reports of *cross-sectional studies*

|                              | Item No | Recommendation                                                                                                                                                                                                                                                                                                                                                                                                                                                                                                                                                                                          |
|------------------------------|---------|---------------------------------------------------------------------------------------------------------------------------------------------------------------------------------------------------------------------------------------------------------------------------------------------------------------------------------------------------------------------------------------------------------------------------------------------------------------------------------------------------------------------------------------------------------------------------------------------------------|
| <b>Title and abstract</b>    | 1       | (a) Indicate the study's design with a commonly used term in the title or the abstract<br>"Radiation oncology outpatient perceptions of patient-centred care: A cross-sectional survey"<br>(b) Provide in the abstract an informative and balanced summary of what was done and what was found<br>See pages 2-3                                                                                                                                                                                                                                                                                         |
| <b>Introduction</b>          |         |                                                                                                                                                                                                                                                                                                                                                                                                                                                                                                                                                                                                         |
| Background/rationale         | 2       | Explain the scientific background and rationale for the investigation being reported<br>See pages 4-6                                                                                                                                                                                                                                                                                                                                                                                                                                                                                                   |
| Objectives                   | 3       | State specific objectives, including any prespecified hypotheses<br>See page 6                                                                                                                                                                                                                                                                                                                                                                                                                                                                                                                          |
| <b>Methods</b>               |         |                                                                                                                                                                                                                                                                                                                                                                                                                                                                                                                                                                                                         |
| Study design                 | 4       | Present key elements of study design early in the paper<br>See "Design" section on page 6                                                                                                                                                                                                                                                                                                                                                                                                                                                                                                               |
| Setting                      | 5       | Describe the setting, locations, and relevant dates, including periods of recruitment, exposure, follow-up, and data collection<br>See "Participants" and "Procedure" sections on pages 6-7                                                                                                                                                                                                                                                                                                                                                                                                             |
| Participants                 | 6       | (a) Give the eligibility criteria, and the sources and methods of selection of participants<br>See "Participants" and "Procedure" sections on page 6-7                                                                                                                                                                                                                                                                                                                                                                                                                                                  |
| Variables                    | 7       | Clearly define all outcomes, exposures, predictors, potential confounders, and effect modifiers. Give diagnostic criteria, if applicable<br>See "Measures" section on pages 7-10, including Table 1.                                                                                                                                                                                                                                                                                                                                                                                                    |
| Data sources/<br>measurement | 8*      | For each variable of interest, give sources of data and details of methods of assessment (measurement). Describe comparability of assessment methods if there is more than one group<br>See "Measures" section on pages 7-10, including Table 1.                                                                                                                                                                                                                                                                                                                                                        |
| Bias                         | 9       | Describe any efforts to address potential sources of bias<br>See "Statistical methods" section on pages 10-11.                                                                                                                                                                                                                                                                                                                                                                                                                                                                                          |
| Study size                   | 10      | Explain how the study size was arrived at<br>See "Sample size and statistical power" section on page 11.                                                                                                                                                                                                                                                                                                                                                                                                                                                                                                |
| Quantitative variables       | 11      | Explain how quantitative variables were handled in the analyses. If applicable, describe which groupings were chosen and why<br>See "Statistical methods" section on pages 10-11.                                                                                                                                                                                                                                                                                                                                                                                                                       |
| Statistical methods          | 12      | (a) Describe all statistical methods, including those used to control for confounding<br>See "Statistical methods" section on pages 10-11.<br>(b) Describe any methods used to examine subgroups and interactions<br>See "Statistical methods" section on pages 10-11.<br>(c) Explain how missing data were addressed<br>See "Statistical methods" section on pages 10-11.<br>(d) If applicable, describe analytical methods taking account of sampling strategy<br>N/A<br>(e) Describe any sensitivity analyses<br>N/A. For assessment of internal consistency of items see "Measures" section page 7. |

1  
2  
3  
4  
5  
6  
7  
8  
9  
10  
11  
12  
13  
14  
15  
16  
17  
18  
19  
20  
21  
22  
23  
24  
25  
26  
27  
28  
29  
30  
31  
32  
33  
34  
35  
36  
37  
38  
39  
40  
41  
42  
43  
44  
45  
46  
47  
48  
49  
50  
51  
52  
53  
54  
55  
56  
57  
58  
59  
60

| <b>Results</b>           |     |                                                                                                                                                                                                                                                                                                           |
|--------------------------|-----|-----------------------------------------------------------------------------------------------------------------------------------------------------------------------------------------------------------------------------------------------------------------------------------------------------------|
| Participants             | 13* | (a) Report numbers of individuals at each stage of study—eg numbers potentially eligible, examined for eligibility, confirmed eligible, included in the study, completing follow-up, and analysed<br><a href="#">See page 11-12</a>                                                                       |
|                          |     | (b) Give reasons for non-participation at each stage<br><a href="#">See page 12</a>                                                                                                                                                                                                                       |
|                          |     | (c) Consider use of a flow diagram<br><a href="#">Reported in text.</a>                                                                                                                                                                                                                                   |
| Descriptive data         | 14* | (a) Give characteristics of study participants (eg demographic, clinical, social) and information on exposures and potential confounders<br><a href="#">See Table 2.</a>                                                                                                                                  |
|                          |     | (b) Indicate number of participants with missing data for each variable of interest<br><a href="#">See Table 2 and Table 4.</a>                                                                                                                                                                           |
| Outcome data             | 15* | Report numbers of outcome events or summary measures<br><a href="#">See pages 14-20.</a>                                                                                                                                                                                                                  |
| Main results             | 16  | (a) Give unadjusted estimates and, if applicable, confounder-adjusted estimates and their precision (eg, 95% confidence interval). Make clear which confounders were adjusted for and why they were included<br><a href="#">See pages 14-20, “Statistical methods” pages 10-11, and Tables 3 &amp; 4.</a> |
|                          |     | (b) Report category boundaries when continuous variables were categorized<br><a href="#">See “Statistical methods” section on pages 10-11, and Table 4.</a>                                                                                                                                               |
|                          |     | (c) If relevant, consider translating estimates of relative risk into absolute risk for a meaningful time period<br><a href="#">N/A</a>                                                                                                                                                                   |
| Other analyses           | 17  | Report other analyses done—eg analyses of subgroups and interactions, and sensitivity analyses<br><a href="#">N/A</a>                                                                                                                                                                                     |
| <b>Discussion</b>        |     |                                                                                                                                                                                                                                                                                                           |
| Key results              | 18  | Summarise key results with reference to study objectives<br><a href="#">See pages 21-25.</a>                                                                                                                                                                                                              |
| Limitations              | 19  | Discuss limitations of the study, taking into account sources of potential bias or imprecision. Discuss both direction and magnitude of any potential bias<br><a href="#">See pages 24-25.</a>                                                                                                            |
| Interpretation           | 20  | Give a cautious overall interpretation of results considering objectives, limitations, multiplicity of analyses, results from similar studies, and other relevant evidence<br><a href="#">See pages 21-24.</a>                                                                                            |
| Generalisability         | 21  | Discuss the generalisability (external validity) of the study results<br><a href="#">See page 25.</a>                                                                                                                                                                                                     |
| <b>Other information</b> |     |                                                                                                                                                                                                                                                                                                           |
| Funding                  | 22  | Give the source of funding and the role of the funders for the present study and, if applicable, for the original study on which the present article is based<br><a href="#">No specific funding, so a general funding statement is included in the acknowledgements on page 26.</a>                      |

\*Give information separately for exposed and unexposed groups.



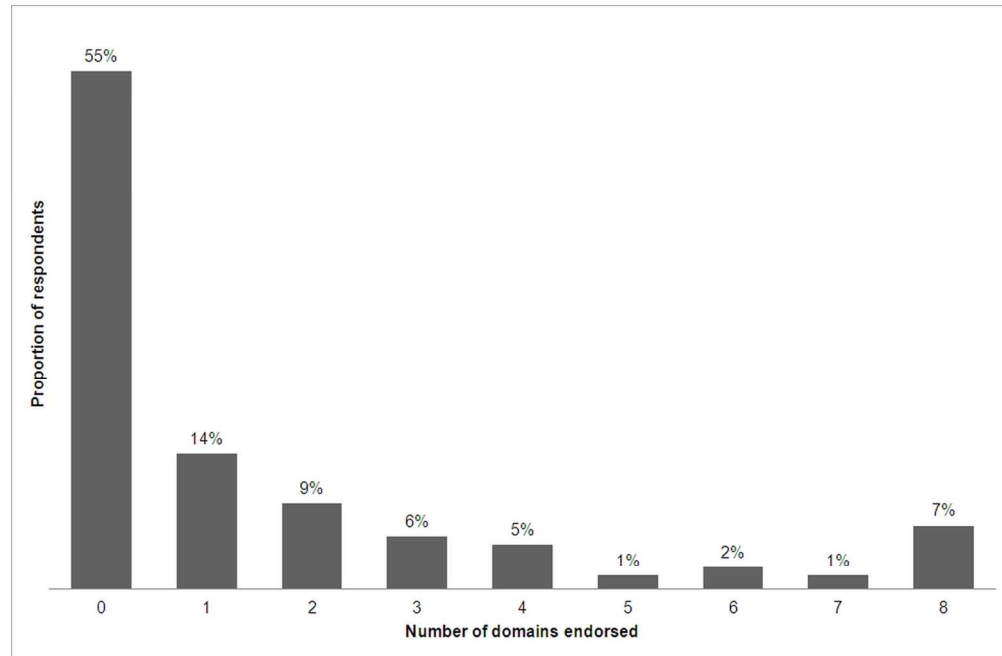

137x90mm (300 x 300 DPI)
